# Supplementary material for: Insight into selectivity: uptake studies of radionuclides 90Sr2+, 137Cs+, and 233UO22+ with bis-amidoxime polymers
Source: Royal Society of Chemistry journal article supplement (doi:10.1039/c7dt04935h), 2018-01-01
Supplement: c7dt04935h1.pdf [file c7dt04935h1.pdf]

Insight into selectivity: Uptake studies of radionuclides  $^{90}\text{Sr}^{2+}$ ,  $^{137}\text{Cs}^+$ , and  $^{233}\text{UO}_2^{2+}$   
with bis-amidoxime polymers

*Marek Piechowicz<sup>a,b</sup>, R. Chiarizia<sup>a</sup>, and L. Soderholm<sup>a,\*</sup>*

<sup>a</sup>Chemical Sciences and Engineering Division, Argonne National Laboratory, Argonne, IL 60439,  
USA

<sup>b</sup>Department of Chemistry, University of Chicago, 5640 S Ellis Ave., Chicago, Illinois 60637,  
United States

\* Email: LS@anl.gov

KEYWORDS: Radionuclides, Bis-amidoxime, separations, cooperative binding

## Table of Contents

1. **Table S1:** Counting Methods Used
2. **Table S2:** Guide to Cartesian Coordinates
  - 2.1. **Cartesian Coordinates** of optimized Cs<sup>+</sup>, Sr<sup>2+</sup>, and UO<sub>2</sub><sup>2+</sup> complexes
3. **Table S3:** Strontium Complex bond distances, bond indices, natural population analysis, and selected metrics
4. **Table S4:** Strontium Complex bond distances, bond indices, natural population analysis, and selected metrics
5. **Table S5:** Cesium Complex bond distances, bond indices, natural population analysis, and selected metrics
6. **Table S6:** Uranium Complex bond distances, bond indices, natural population analysis, and selected metrics
7. **Calculations for Uptake Studies**
8. **Table S7:** Percent Sr, Cs, and U sorbed as a function of pH
9. **Figure S8:** Uptake of Cs<sup>+</sup> and UO<sub>2</sub><sup>2+</sup> at pH = 8 as a function of time
10. **Table S9:** Comparison of Advanced Sorbent Materials for U uptake
11. **References**

**Table S1: Counting Methods**

| Isotope           | Method     | Region of Interest (keV) | Time (min.) | Sigma |
|-------------------|------------|--------------------------|-------------|-------|
| <sup>90</sup> Sr  | Alpha/Beta | 0-750                    | 10          | 0.2   |
| <sup>137</sup> Cs | Gamma      | 580-754                  | 10          | 0.3   |
| <sup>233</sup> U  | Alpha/Beta | 0-750                    | 10          | 0.2   |

**Table S2: Cartesian coordinates for optimized Sr, Cs, and U complexes**

| Metal | Starting Geometry | Ligand Protonation State |        |                      |
|-------|-------------------|--------------------------|--------|----------------------|
|       |                   | bis-AO <sup>-1</sup>     | bis-AO | bis-AO <sup>+1</sup> |
| Sr    | (A)               | SrA1                     | SrA2   | SrA3                 |
|       | (B)               | SrB1                     | SrB2   | SrB3                 |
|       | (C)               | SrC1                     | SrC2   | SrC3                 |
|       | (D)               | SrD1                     | SrD2   | NA                   |
| Cs    | (A)               | CsA1                     | CsA2   |                      |
|       | (B)               | CsB1                     | CsB2   |                      |
|       | (C)               | CsC1                     | CsC2   |                      |
|       | (D)               | CsD1                     | CsD2   |                      |
| U     | (B)               | UB1                      | UB2    | UB3                  |
|       | (D)               | UD1                      | UD2    | UD3                  |

## SrA1

|    |                 |                 |                 |
|----|-----------------|-----------------|-----------------|
| C  | 5.012073000000  | 5.548133000000  | -2.398450000000 |
| C  | 4.464289000000  | 4.314425000000  | -2.741354000000 |
| C  | 3.296158000000  | 4.266692000000  | -3.502673000000 |
| C  | 2.668579000000  | 5.447769000000  | -3.922207000000 |
| C  | 3.230688000000  | 6.675794000000  | -3.560752000000 |
| C  | 4.399208000000  | 6.733148000000  | -2.804994000000 |
| H  | 5.920086000000  | 5.579084000000  | -1.805654000000 |
| H  | 4.939155000000  | 3.394415000000  | -2.422280000000 |
| H  | 2.746909000000  | 7.590349000000  | -3.886917000000 |
| H  | 4.827375000000  | 7.692719000000  | -2.537850000000 |
| O  | 2.674189000000  | 3.077264000000  | -3.827379000000 |
| C  | 3.441687000000  | 1.932598000000  | -4.055887000000 |
| C  | 4.426335000000  | 1.968324000000  | -5.042521000000 |
| C  | 3.162246000000  | 0.764029000000  | -3.326218000000 |
| C  | 5.181762000000  | 0.833244000000  | -5.314347000000 |
| H  | 4.597382000000  | 2.890972000000  | -5.586151000000 |
| C  | 3.935647000000  | -0.371933000000 | -3.636553000000 |
| C  | 4.934821000000  | -0.342164000000 | -4.601081000000 |
| H  | 5.945940000000  | 0.864095000000  | -6.083478000000 |
| H  | 3.727943000000  | -1.287923000000 | -3.097579000000 |
| H  | 5.508384000000  | -1.238958000000 | -4.810701000000 |
| C  | 2.123408000000  | 0.676034000000  | -2.273304000000 |
| N  | 0.918847000000  | 1.370224000000  | -2.409013000000 |
| H  | 0.999189000000  | 2.281969000000  | -2.835623000000 |
| H  | 0.433838000000  | 1.374599000000  | -1.516562000000 |
| N  | 2.326179000000  | -0.133405000000 | -1.276321000000 |
| C  | 1.420739000000  | 5.403449000000  | -4.741320000000 |
| N  | 0.222399000000  | 5.402047000000  | -4.086730000000 |
| N  | 1.563101000000  | 5.433757000000  | -6.023170000000 |
| H  | 0.203977000000  | 5.163814000000  | -3.108347000000 |
| H  | -0.605809000000 | 5.177210000000  | -4.617727000000 |
| O  | 1.302093000000  | -0.162437000000 | -0.365024000000 |
| O  | 0.270402000000  | 5.400913000000  | -6.645509000000 |
| H  | 0.476130000000  | 5.383463000000  | -7.587404000000 |
| Sr | 1.320781000000  | -2.069404000000 | 1.260373000000  |

## SrA2

|   |                |                |                 |
|---|----------------|----------------|-----------------|
| C | 5.292005000000 | 6.155048000000 | -2.776284000000 |
| C | 4.893466000000 | 4.830479000000 | -2.624403000000 |
| C | 3.658669000000 | 4.409720000000 | -3.111686000000 |
| C | 2.777055000000 | 5.310985000000 | -3.731411000000 |
| C | 3.200821000000 | 6.643694000000 | -3.868721000000 |

|    |                 |                 |                 |
|----|-----------------|-----------------|-----------------|
| C  | 4.443653000000  | 7.063281000000  | -3.407307000000 |
| H  | 6.257267000000  | 6.473643000000  | -2.398620000000 |
| H  | 5.532141000000  | 4.112196000000  | -2.122924000000 |
| H  | 2.548480000000  | 7.355318000000  | -4.360989000000 |
| H  | 4.744776000000  | 8.096707000000  | -3.537138000000 |
| O  | 3.255742000000  | 3.105574000000  | -2.871776000000 |
| C  | 3.791590000000  | 2.052305000000  | -3.577790000000 |
| C  | 4.813284000000  | 2.188043000000  | -4.516281000000 |
| C  | 3.252571000000  | 0.785007000000  | -3.291151000000 |
| C  | 5.321250000000  | 1.056522000000  | -5.153183000000 |
| H  | 5.217224000000  | 3.165239000000  | -4.746815000000 |
| C  | 3.784925000000  | -0.335188000000 | -3.936444000000 |
| C  | 4.818767000000  | -0.209307000000 | -4.861012000000 |
| H  | 6.115907000000  | 1.174224000000  | -5.882210000000 |
| H  | 3.364525000000  | -1.309230000000 | -3.715104000000 |
| H  | 5.215949000000  | -1.087950000000 | -5.356452000000 |
| C  | 2.111069000000  | 0.623927000000  | -2.349162000000 |
| N  | 0.975886000000  | 1.339102000000  | -2.580882000000 |
| H  | 1.062590000000  | 2.161781000000  | -3.165102000000 |
| H  | 0.318122000000  | 1.408866000000  | -1.817248000000 |
| N  | 2.262153000000  | -0.266584000000 | -1.418937000000 |
| C  | 1.418431000000  | 4.939619000000  | -4.212170000000 |
| N  | 0.442256000000  | 5.897252000000  | -4.125636000000 |
| N  | 1.240432000000  | 3.779978000000  | -4.761555000000 |
| H  | 0.522049000000  | 6.588196000000  | -3.395695000000 |
| H  | -0.499782000000 | 5.592950000000  | -4.321598000000 |
| O  | 1.020327000000  | -0.387411000000 | -0.671932000000 |
| H  | 1.311756000000  | -0.702066000000 | 0.192980000000  |
| O  | -0.123470000000 | 3.651708000000  | -5.168819000000 |
| H  | -0.149292000000 | 2.793001000000  | -5.607651000000 |
| Sr | -0.884708000000 | -2.124389000000 | -1.746616000000 |

### SrA3

|   |                |                |                 |
|---|----------------|----------------|-----------------|
| C | 5.308126000000 | 6.170840000000 | -2.744252000000 |
| C | 4.907728000000 | 4.848379000000 | -2.579370000000 |
| C | 3.680014000000 | 4.423416000000 | -3.075609000000 |
| C | 2.794695000000 | 5.311774000000 | -3.709767000000 |
| C | 3.229813000000 | 6.639094000000 | -3.870713000000 |
| C | 4.468017000000 | 7.065321000000 | -3.403281000000 |
| H | 6.268356000000 | 6.495576000000 | -2.359714000000 |
| H | 5.540332000000 | 4.135322000000 | -2.063177000000 |
| H | 2.594718000000 | 7.346157000000 | -4.390049000000 |
| H | 4.770908000000 | 8.095590000000 | -3.551450000000 |
| O | 3.290889000000 | 3.110881000000 | -2.835809000000 |

|    |                 |                 |                 |
|----|-----------------|-----------------|-----------------|
| C  | 3.803579000000  | 2.074750000000  | -3.565925000000 |
| C  | 4.850019000000  | 2.197879000000  | -4.477090000000 |
| C  | 3.222311000000  | 0.810514000000  | -3.336994000000 |
| C  | 5.325922000000  | 1.069317000000  | -5.140540000000 |
| H  | 5.295560000000  | 3.165329000000  | -4.666343000000 |
| C  | 3.721711000000  | -0.313738000000 | -4.008861000000 |
| C  | 4.772571000000  | -0.188940000000 | -4.908349000000 |
| H  | 6.139440000000  | 1.181532000000  | -5.848670000000 |
| H  | 3.255353000000  | -1.281120000000 | -3.860719000000 |
| H  | 5.143712000000  | -1.060834000000 | -5.433071000000 |
| C  | 2.060167000000  | 0.672369000000  | -2.441713000000 |
| N  | 1.041123000000  | 1.494481000000  | -2.508058000000 |
| H  | 1.079573000000  | 2.287701000000  | -3.151073000000 |
| H  | 0.250163000000  | 1.395590000000  | -1.886498000000 |
| C  | 1.433885000000  | 4.942932000000  | -4.190346000000 |
| N  | 0.511802000000  | 5.945849000000  | -4.286480000000 |
| N  | 1.194793000000  | 3.723838000000  | -4.573507000000 |
| H  | 0.596512000000  | 6.740241000000  | -3.672418000000 |
| H  | -0.434327000000 | 5.666636000000  | -4.497569000000 |
| O  | 0.917185000000  | -0.626872000000 | -0.867913000000 |
| H  | 1.062107000000  | -0.353431000000 | 0.053564000000  |
| O  | -0.159069000000 | 3.625786000000  | -5.020326000000 |
| H  | -0.204556000000 | 2.752842000000  | -5.429240000000 |
| Sr | -0.748845000000 | -3.069391000000 | -1.254334000000 |
| N  | 2.073306000000  | -0.329198000000 | -1.565356000000 |
| H  | 2.797475000000  | -1.034624000000 | -1.535757000000 |

### SrB1

|   |                |                 |                 |
|---|----------------|-----------------|-----------------|
| C | 5.218071000000 | 6.273431000000  | -2.730712000000 |
| C | 4.862372000000 | 4.937049000000  | -2.572712000000 |
| C | 3.673996000000 | 4.458765000000  | -3.120618000000 |
| C | 2.804231000000 | 5.315161000000  | -3.814649000000 |
| C | 3.177439000000 | 6.661595000000  | -3.952169000000 |
| C | 4.373858000000 | 7.137877000000  | -3.426629000000 |
| H | 6.146259000000 | 6.637354000000  | -2.303984000000 |
| H | 5.496133000000 | 4.254768000000  | -2.017490000000 |
| H | 2.519419000000 | 7.336301000000  | -4.487868000000 |
| H | 4.641756000000 | 8.180661000000  | -3.555132000000 |
| O | 3.292856000000 | 3.151496000000  | -2.853751000000 |
| C | 3.824526000000 | 2.092025000000  | -3.580267000000 |
| C | 4.890310000000 | 2.261617000000  | -4.461930000000 |
| C | 3.250491000000 | 0.822276000000  | -3.355957000000 |
| C | 5.435753000000 | 1.161167000000  | -5.120976000000 |
| H | 5.303460000000 | 3.248013000000  | -4.630256000000 |
| C | 3.826609000000 | -0.264415000000 | -4.039329000000 |

|    |                 |                 |                 |
|----|-----------------|-----------------|-----------------|
| C  | 4.909317000000  | -0.110232000000 | -4.898706000000 |
| H  | 6.264562000000  | 1.306137000000  | -5.805863000000 |
| H  | 3.387183000000  | -1.243243000000 | -3.890528000000 |
| H  | 5.321920000000  | -0.973518000000 | -5.410243000000 |
| C  | 2.092765000000  | 0.592184000000  | -2.473852000000 |
| N  | 1.079968000000  | 1.587134000000  | -2.317915000000 |
| H  | 0.952581000000  | 2.150893000000  | -3.151971000000 |
| H  | 0.226642000000  | 1.079453000000  | -2.075929000000 |
| N  | 1.979137000000  | -0.534992000000 | -1.831194000000 |
| C  | 1.491195000000  | 4.874378000000  | -4.359669000000 |
| N  | 0.423175000000  | 5.713009000000  | -4.167895000000 |
| N  | 1.442984000000  | 3.780596000000  | -5.046362000000 |
| H  | 0.440842000000  | 6.321569000000  | -3.364082000000 |
| H  | -0.485959000000 | 5.343912000000  | -4.404555000000 |
| O  | 0.853806000000  | -0.671505000000 | -1.104549000000 |
| O  | 0.098987000000  | 3.546406000000  | -5.475962000000 |
| H  | 0.164158000000  | 2.728601000000  | -5.983245000000 |
| Sr | 1.557324000000  | 3.102850000000  | -0.070174000000 |

## SrB2

|   |                |                 |                 |
|---|----------------|-----------------|-----------------|
| C | 5.202436000000 | 6.256394000000  | -2.682993000000 |
| C | 4.837591000000 | 4.924837000000  | -2.506900000000 |
| C | 3.658844000000 | 4.441270000000  | -3.066520000000 |
| C | 2.791582000000 | 5.284050000000  | -3.782679000000 |
| C | 3.184105000000 | 6.623493000000  | -3.947208000000 |
| C | 4.374745000000 | 7.105599000000  | -3.414579000000 |
| H | 6.125336000000 | 6.624704000000  | -2.249154000000 |
| H | 5.460836000000 | 4.247545000000  | -1.934053000000 |
| H | 2.548809000000 | 7.291922000000  | -4.516039000000 |
| H | 4.650204000000 | 8.142987000000  | -3.567464000000 |
| O | 3.299299000000 | 3.123283000000  | -2.800027000000 |
| C | 3.830515000000 | 2.092372000000  | -3.555366000000 |
| C | 4.889676000000 | 2.284125000000  | -4.441829000000 |
| C | 3.271053000000 | 0.812951000000  | -3.375979000000 |
| C | 5.417217000000 | 1.202876000000  | -5.142731000000 |
| H | 5.307015000000 | 3.272232000000  | -4.583695000000 |
| C | 3.825434000000 | -0.257618000000 | -4.092998000000 |
| C | 4.892299000000 | -0.075409000000 | -4.964920000000 |
| H | 6.239636000000 | 1.368514000000  | -5.830305000000 |
| H | 3.388037000000 | -1.240163000000 | -3.966369000000 |
| H | 5.297037000000 | -0.919380000000 | -5.511873000000 |
| C | 2.106023000000 | 0.555382000000  | -2.493626000000 |
| N | 1.117843000000 | 1.530995000000  | -2.343898000000 |
| H | 1.088204000000 | 2.199945000000  | -3.108662000000 |
| H | 0.208052000000 | 1.124639000000  | -2.151024000000 |

|    |                 |                 |                 |
|----|-----------------|-----------------|-----------------|
| N  | 2.064010000000  | -0.579377000000 | -1.883798000000 |
| C  | 1.477281000000  | 4.854127000000  | -4.333334000000 |
| N  | 0.483762000000  | 5.796112000000  | -4.387675000000 |
| N  | 1.353266000000  | 3.653950000000  | -4.805642000000 |
| H  | 0.495864000000  | 6.537805000000  | -3.704783000000 |
| H  | -0.435768000000 | 5.458800000000  | -4.630997000000 |
| O  | 0.859794000000  | -0.690096000000 | -1.141490000000 |
| H  | 0.895397000000  | -1.583598000000 | -0.779166000000 |
| O  | 0.024581000000  | 3.470494000000  | -5.295878000000 |
| H  | 0.042331000000  | 2.583487000000  | -5.675055000000 |
| Sr | 1.561176000000  | 3.155927000000  | 0.032418000000  |

### SrB3

|   |                 |                 |                 |
|---|-----------------|-----------------|-----------------|
| C | 5.131446000000  | 6.175956000000  | -2.625626000000 |
| C | 4.777430000000  | 4.834224000000  | -2.521140000000 |
| C | 3.591618000000  | 4.377716000000  | -3.087218000000 |
| C | 2.699604000000  | 5.252253000000  | -3.731907000000 |
| C | 3.088337000000  | 6.600017000000  | -3.830740000000 |
| C | 4.286397000000  | 7.058415000000  | -3.294367000000 |
| H | 6.060358000000  | 6.524435000000  | -2.188532000000 |
| H | 5.415989000000  | 4.129247000000  | -2.001177000000 |
| H | 2.450160000000  | 7.299060000000  | -4.357075000000 |
| H | 4.554338000000  | 8.103737000000  | -3.397463000000 |
| O | 3.247203000000  | 3.043089000000  | -2.910856000000 |
| C | 3.850971000000  | 2.052874000000  | -3.637130000000 |
| C | 4.942673000000  | 2.256271000000  | -4.478590000000 |
| C | 3.321731000000  | 0.754293000000  | -3.480926000000 |
| C | 5.518229000000  | 1.174914000000  | -5.141382000000 |
| H | 5.346861000000  | 3.250380000000  | -4.614574000000 |
| C | 3.922896000000  | -0.321195000000 | -4.151563000000 |
| C | 5.020493000000  | -0.116779000000 | -4.976832000000 |
| H | 6.365292000000  | 1.351090000000  | -5.795138000000 |
| H | 3.498831000000  | -1.313796000000 | -4.054547000000 |
| H | 5.469517000000  | -0.952506000000 | -5.499663000000 |
| C | 2.112994000000  | 0.516595000000  | -2.674792000000 |
| N | 1.079465000000  | 1.320800000000  | -2.722233000000 |
| H | 1.110979000000  | 2.150232000000  | -3.317618000000 |
| H | 0.275620000000  | 1.153492000000  | -2.132094000000 |
| C | 1.377344000000  | 4.847184000000  | -4.285141000000 |
| N | 0.426715000000  | 5.820226000000  | -4.412691000000 |
| N | 1.197831000000  | 3.627385000000  | -4.696701000000 |
| H | 0.452811000000  | 6.606357000000  | -3.783068000000 |
| H | -0.498013000000 | 5.510848000000  | -4.671488000000 |
| O | 0.970616000000  | -0.780374000000 | -1.114014000000 |
| H | 0.502652000000  | -1.562692000000 | -1.449067000000 |



|    |                 |                 |                 |
|----|-----------------|-----------------|-----------------|
| O  | -0.127083000000 | 3.492175000000  | -5.211603000000 |
| H  | -0.129996000000 | 2.615751000000  | -5.615565000000 |
| Sr | 2.408897000000  | 4.296259000000  | 0.907184000000  |
| N  | 2.066980000000  | -0.598845000000 | -1.940304000000 |
| H  | 2.914836000000  | -1.045818000000 | -1.614728000000 |

### SrC1

|    |                 |                 |                 |
|----|-----------------|-----------------|-----------------|
| C  | 5.087781000000  | 5.905398000000  | -2.665286000000 |
| C  | 4.606131000000  | 4.600621000000  | -2.700355000000 |
| C  | 3.375046000000  | 4.332525000000  | -3.298333000000 |
| C  | 2.613459000000  | 5.364898000000  | -3.860011000000 |
| C  | 3.105147000000  | 6.675489000000  | -3.798388000000 |
| C  | 4.337493000000  | 6.947282000000  | -3.213028000000 |
| H  | 6.045163000000  | 6.109002000000  | -2.198024000000 |
| H  | 5.172168000000  | 3.788459000000  | -2.258765000000 |
| H  | 2.518036000000  | 7.480541000000  | -4.226780000000 |
| H  | 4.709714000000  | 7.965062000000  | -3.182492000000 |
| O  | 2.827740000000  | 3.064776000000  | -3.244075000000 |
| C  | 3.494833000000  | 1.969958000000  | -3.778698000000 |
| C  | 4.439338000000  | 2.123068000000  | -4.793375000000 |
| C  | 3.149769000000  | 0.698227000000  | -3.278148000000 |
| C  | 5.085739000000  | 1.007642000000  | -5.318985000000 |
| H  | 4.672246000000  | 3.113034000000  | -5.166339000000 |
| C  | 3.813250000000  | -0.405879000000 | -3.842015000000 |
| C  | 4.774768000000  | -0.263398000000 | -4.836543000000 |
| H  | 5.818816000000  | 1.136177000000  | -6.108226000000 |
| H  | 3.550011000000  | -1.391474000000 | -3.478458000000 |
| H  | 5.264600000000  | -1.140834000000 | -5.245340000000 |
| C  | 2.143380000000  | 0.476957000000  | -2.211323000000 |
| N  | 0.985150000000  | 1.258533000000  | -2.156265000000 |
| H  | 1.120746000000  | 2.234602000000  | -2.377702000000 |
| H  | 0.525927000000  | 1.102548000000  | -1.263369000000 |
| N  | 2.316099000000  | -0.527112000000 | -1.403673000000 |
| C  | 1.288978000000  | 5.096429000000  | -4.491351000000 |
| N  | 0.196876000000  | 5.692705000000  | -3.937949000000 |
| N  | 1.290769000000  | 4.367775000000  | -5.559161000000 |
| H  | 0.261544000000  | 6.018382000000  | -2.986248000000 |
| H  | -0.714187000000 | 5.374952000000  | -4.235075000000 |
| O  | 1.317421000000  | -0.676326000000 | -0.475740000000 |
| O  | -0.071310000000 | 4.223946000000  | -6.042455000000 |
| H  | -0.059792000000 | 3.366737000000  | -6.486939000000 |
| Sr | 0.853423000000  | -2.928499000000 | 0.515430000000  |
| Sr | -1.108613000000 | 6.145192000000  | -7.766506000000 |

## SrC2

|    |                 |                 |                 |
|----|-----------------|-----------------|-----------------|
| C  | 5.157400000000  | 6.038178000000  | -2.750497000000 |
| C  | 4.727321000000  | 4.716726000000  | -2.682140000000 |
| C  | 3.480653000000  | 4.363608000000  | -3.194008000000 |
| C  | 2.636613000000  | 5.326388000000  | -3.764379000000 |
| C  | 3.082952000000  | 6.655859000000  | -3.809893000000 |
| C  | 4.333912000000  | 7.011092000000  | -3.316960000000 |
| H  | 6.129334000000  | 6.306890000000  | -2.351659000000 |
| H  | 5.347290000000  | 3.954111000000  | -2.224650000000 |
| H  | 2.443355000000  | 7.411847000000  | -4.251232000000 |
| H  | 4.662427000000  | 8.042775000000  | -3.371478000000 |
| O  | 3.017578000000  | 3.068159000000  | -3.027311000000 |
| C  | 3.614679000000  | 2.011172000000  | -3.677683000000 |
| C  | 4.536381000000  | 2.169588000000  | -4.711125000000 |
| C  | 3.231652000000  | 0.726283000000  | -3.253375000000 |
| C  | 5.094658000000  | 1.045742000000  | -5.317385000000 |
| H  | 4.820612000000  | 3.161350000000  | -5.039060000000 |
| C  | 3.807560000000  | -0.385804000000 | -3.876624000000 |
| C  | 4.737459000000  | -0.235205000000 | -4.901790000000 |
| H  | 5.809689000000  | 1.180117000000  | -6.121953000000 |
| H  | 3.508708000000  | -1.375041000000 | -3.550608000000 |
| H  | 5.170563000000  | -1.108753000000 | -5.375583000000 |
| C  | 2.234165000000  | 0.527757000000  | -2.166200000000 |
| N  | 1.008093000000  | 1.113953000000  | -2.277643000000 |
| H  | 0.941689000000  | 1.922707000000  | -2.877559000000 |
| H  | 0.453567000000  | 1.159423000000  | -1.433958000000 |
| N  | 2.591461000000  | -0.277263000000 | -1.215316000000 |
| C  | 1.281718000000  | 4.995198000000  | -4.287421000000 |
| N  | 0.255505000000  | 5.820213000000  | -3.929823000000 |
| N  | 1.184216000000  | 3.997721000000  | -5.106285000000 |
| H  | 0.356340000000  | 6.361120000000  | -3.084807000000 |
| H  | -0.681160000000 | 5.500538000000  | -4.129494000000 |
| O  | 1.477198000000  | -0.454470000000 | -0.298838000000 |
| H  | 1.909860000000  | -0.628286000000 | 0.546923000000  |
| O  | -0.194907000000 | 3.864722000000  | -5.532732000000 |
| H  | -0.273011000000 | 2.925510000000  | -5.744163000000 |
| Sr | -0.202539000000 | -2.578967000000 | -0.931678000000 |
| Sr | -0.975472000000 | 5.344153000000  | -7.784681000000 |

## SrC3

|   |                |                |                 |
|---|----------------|----------------|-----------------|
| C | 5.234780000000 | 6.174890000000 | -2.922144000000 |
| C | 4.877167000000 | 4.841168000000 | -2.749990000000 |
| C | 3.614894000000 | 4.403112000000 | -3.136417000000 |
| C | 2.659508000000 | 5.289428000000 | -3.658982000000 |

|    |                 |                 |                 |
|----|-----------------|-----------------|-----------------|
| C  | 3.048325000000  | 6.629457000000  | -3.826764000000 |
| C  | 4.319078000000  | 7.068727000000  | -3.472736000000 |
| H  | 6.221830000000  | 6.510041000000  | -2.624318000000 |
| H  | 5.569789000000  | 4.132362000000  | -2.311127000000 |
| H  | 2.350181000000  | 7.334945000000  | -4.260848000000 |
| H  | 4.588358000000  | 8.107912000000  | -3.622687000000 |
| O  | 3.257281000000  | 3.084204000000  | -2.890722000000 |
| C  | 3.783796000000  | 2.048395000000  | -3.612221000000 |
| C  | 4.774040000000  | 2.187285000000  | -4.581665000000 |
| C  | 3.269317000000  | 0.768542000000  | -3.315944000000 |
| C  | 5.263039000000  | 1.059572000000  | -5.236955000000 |
| H  | 5.165845000000  | 3.165958000000  | -4.824006000000 |
| C  | 3.780705000000  | -0.353594000000 | -3.983160000000 |
| C  | 4.777175000000  | -0.212763000000 | -4.939900000000 |
| H  | 6.032230000000  | 1.183906000000  | -5.991021000000 |
| H  | 3.364466000000  | -1.334824000000 | -3.785455000000 |
| H  | 5.157481000000  | -1.084128000000 | -5.458813000000 |
| C  | 2.164336000000  | 0.608349000000  | -2.355497000000 |
| N  | 1.122324000000  | 1.406152000000  | -2.364410000000 |
| H  | 1.105370000000  | 2.200491000000  | -3.001878000000 |
| H  | 0.371425000000  | 1.291686000000  | -1.697479000000 |
| C  | 1.265255000000  | 4.902247000000  | -4.017328000000 |
| N  | 0.308230000000  | 5.865903000000  | -3.910754000000 |
| N  | 1.037015000000  | 3.711774000000  | -4.490908000000 |
| H  | 0.467378000000  | 6.630339000000  | -3.273511000000 |
| H  | -0.652091000000 | 5.564376000000  | -3.985973000000 |
| O  | 1.135274000000  | -0.708827000000 | -0.720923000000 |
| H  | 1.325571000000  | -0.438837000000 | 0.193218000000  |
| O  | -0.350798000000 | 3.618433000000  | -4.874268000000 |
| H  | -0.497572000000 | 2.669719000000  | -4.981028000000 |
| Sr | -0.530309000000 | -3.154891000000 | -1.097389000000 |
| Sr | -1.032506000000 | 4.758134000000  | -7.508691000000 |
| N  | 2.246611000000  | -0.388522000000 | -1.478125000000 |
| H  | 2.987818000000  | -1.076773000000 | -1.482543000000 |

### SrD1

|   |                |                |                 |
|---|----------------|----------------|-----------------|
| C | 5.023446000000 | 6.348345000000 | -2.152401000000 |
| C | 4.601607000000 | 5.022228000000 | -2.156496000000 |
| C | 3.523020000000 | 4.631062000000 | -2.946174000000 |
| C | 2.819632000000 | 5.564309000000 | -3.725708000000 |
| C | 3.261208000000 | 6.897927000000 | -3.701381000000 |
| C | 4.353418000000 | 7.288241000000 | -2.934057000000 |
| H | 5.867111000000 | 6.643622000000 | -1.538410000000 |
| H | 5.100621000000 | 4.277775000000 | -1.546295000000 |
| H | 2.744437000000 | 7.633529000000 | -4.306707000000 |

|    |                 |                 |                 |
|----|-----------------|-----------------|-----------------|
| H  | 4.675713000000  | 8.323433000000  | -2.943769000000 |
| O  | 3.078239000000  | 3.320356000000  | -2.856440000000 |
| C  | 3.727519000000  | 2.303543000000  | -3.537232000000 |
| C  | 4.908057000000  | 2.522609000000  | -4.247073000000 |
| C  | 3.147775000000  | 1.019394000000  | -3.468292000000 |
| C  | 5.551127000000  | 1.463522000000  | -4.882485000000 |
| H  | 5.330423000000  | 3.517738000000  | -4.300031000000 |
| C  | 3.821255000000  | -0.024874000000 | -4.126551000000 |
| C  | 5.010283000000  | 0.180527000000  | -4.815765000000 |
| H  | 6.468223000000  | 1.649185000000  | -5.431346000000 |
| H  | 3.377225000000  | -1.012188000000 | -4.096658000000 |
| H  | 5.498588000000  | -0.650286000000 | -5.313489000000 |
| C  | 1.879921000000  | 0.724540000000  | -2.768367000000 |
| N  | 0.887917000000  | 1.717935000000  | -2.588551000000 |
| H  | 0.884545000000  | 2.417375000000  | -3.323390000000 |
| H  | -0.008415000000 | 1.237011000000  | -2.510260000000 |
| N  | 1.664793000000  | -0.470813000000 | -2.318441000000 |
| C  | 1.616000000000  | 5.221260000000  | -4.530096000000 |
| N  | 0.624219000000  | 6.167651000000  | -4.606040000000 |
| N  | 1.596273000000  | 4.101669000000  | -5.177220000000 |
| H  | 0.518635000000  | 6.798986000000  | -3.826692000000 |
| H  | -0.243363000000 | 5.866564000000  | -5.024991000000 |
| O  | 0.436446000000  | -0.687316000000 | -1.755434000000 |
| O  | 0.363411000000  | 3.982741000000  | -5.887937000000 |
| H  | 0.441371000000  | 3.130889000000  | -6.333554000000 |
| Sr | 1.456259000000  | -3.056994000000 | -1.631134000000 |
| Sr | 1.093740000000  | 3.014595000000  | -0.097755000000 |

## SrD2

|   |                |                |                 |
|---|----------------|----------------|-----------------|
| C | 5.357169000000 | 6.210281000000 | -2.836253000000 |
| C | 4.957816000000 | 4.889882000000 | -2.651754000000 |
| C | 3.723659000000 | 4.460153000000 | -3.131312000000 |
| C | 2.845808000000 | 5.344451000000 | -3.778104000000 |
| C | 3.268669000000 | 6.673383000000 | -3.946466000000 |
| C | 4.510506000000 | 7.103205000000 | -3.491119000000 |
| H | 6.321505000000 | 6.537983000000 | -2.464177000000 |
| H | 5.593854000000 | 4.183805000000 | -2.129969000000 |
| H | 2.615618000000 | 7.372786000000 | -4.455272000000 |
| H | 4.812313000000 | 8.133282000000 | -3.643739000000 |
| O | 3.315072000000 | 3.163285000000 | -2.850343000000 |
| C | 3.797026000000 | 2.094869000000 | -3.569202000000 |
| C | 4.811876000000 | 2.203302000000 | -4.518496000000 |
| C | 3.220675000000 | 0.844293000000 | -3.281869000000 |
| C | 5.274695000000 | 1.062696000000 | -5.171266000000 |
| H | 5.244352000000 | 3.169077000000 | -4.745102000000 |

|    |                 |                 |                 |
|----|-----------------|-----------------|-----------------|
| C  | 3.710398000000  | -0.287937000000 | -3.945112000000 |
| C  | 4.733594000000  | -0.188131000000 | -4.882626000000 |
| H  | 6.063023000000  | 1.160757000000  | -5.909858000000 |
| H  | 3.260400000000  | -1.249152000000 | -3.728749000000 |
| H  | 5.092688000000  | -1.075269000000 | -5.391549000000 |
| C  | 2.088561000000  | 0.688313000000  | -2.330935000000 |
| N  | 1.027082000000  | 1.578641000000  | -2.377991000000 |
| H  | 0.981508000000  | 2.141175000000  | -3.221361000000 |
| H  | 0.136934000000  | 1.169724000000  | -2.120852000000 |
| N  | 2.171843000000  | -0.301601000000 | -1.506321000000 |
| C  | 1.488172000000  | 4.958126000000  | -4.250623000000 |
| N  | 0.495932000000  | 5.891833000000  | -4.121802000000 |
| N  | 1.329419000000  | 3.809481000000  | -4.827681000000 |
| H  | 0.578856000000  | 6.580311000000  | -3.390291000000 |
| H  | -0.444122000000 | 5.586144000000  | -4.323319000000 |
| O  | 0.935665000000  | -0.420594000000 | -0.759695000000 |
| H  | 1.231027000000  | -0.648807000000 | 0.132259000000  |
| O  | -0.042015000000 | 3.655518000000  | -5.207141000000 |
| H  | -0.044510000000 | 2.841090000000  | -5.724309000000 |
| Sr | -0.555392000000 | -2.678486000000 | -1.588569000000 |
| Sr | 0.967309000000  | 3.585683000000  | -0.154499000000 |

### CsA1

|   |                |                 |                 |
|---|----------------|-----------------|-----------------|
| C | 4.969773000000 | 5.454945000000  | -2.353278000000 |
| C | 4.428106000000 | 4.239510000000  | -2.765967000000 |
| C | 3.273135000000 | 4.229108000000  | -3.548965000000 |
| C | 2.653363000000 | 5.432233000000  | -3.919102000000 |
| C | 3.211059000000 | 6.639876000000  | -3.490628000000 |
| C | 4.366358000000 | 6.659457000000  | -2.712341000000 |
| H | 5.867422000000 | 5.454927000000  | -1.743988000000 |
| H | 4.899473000000 | 3.305714000000  | -2.484928000000 |
| H | 2.733002000000 | 7.569613000000  | -3.780373000000 |
| H | 4.790507000000 | 7.604280000000  | -2.391597000000 |
| O | 2.658819000000 | 3.063968000000  | -3.958016000000 |
| C | 3.416680000000 | 1.894730000000  | -4.096890000000 |
| C | 4.418505000000 | 1.868027000000  | -5.065483000000 |
| C | 3.117107000000 | 0.776754000000  | -3.297513000000 |
| C | 5.180696000000 | 0.719597000000  | -5.249205000000 |
| H | 4.598698000000 | 2.755920000000  | -5.662024000000 |
| C | 3.901615000000 | -0.375049000000 | -3.518333000000 |
| C | 4.920291000000 | -0.405339000000 | -4.461737000000 |
| H | 5.959401000000 | 0.700305000000  | -6.003990000000 |
| H | 3.683844000000 | -1.255394000000 | -2.926157000000 |
| H | 5.498728000000 | -1.313114000000 | -4.599555000000 |
| C | 2.055198000000 | 0.757034000000  | -2.271236000000 |

|    |                 |                 |                 |
|----|-----------------|-----------------|-----------------|
| N  | 0.849885000000  | 1.445559000000  | -2.480027000000 |
| H  | 0.951705000000  | 2.334547000000  | -2.949052000000 |
| H  | 0.359634000000  | 1.512784000000  | -1.591615000000 |
| N  | 2.223117000000  | 0.011374000000  | -1.214520000000 |
| C  | 1.417435000000  | 5.430011000000  | -4.756785000000 |
| N  | 0.211762000000  | 5.345230000000  | -4.122559000000 |
| N  | 1.574105000000  | 5.570731000000  | -6.029858000000 |
| H  | 0.185176000000  | 5.047229000000  | -3.161133000000 |
| H  | -0.605995000000 | 5.146370000000  | -4.679205000000 |
| O  | 1.199954000000  | 0.029564000000  | -0.325472000000 |
| O  | 0.289153000000  | 5.565723000000  | -6.669722000000 |
| H  | 0.506310000000  | 5.623310000000  | -7.607429000000 |
| Cs | 3.006239000000  | -2.093058000000 | 1.122967000000  |

## CsA2

|   |                 |                 |                 |
|---|-----------------|-----------------|-----------------|
| C | 5.135494000000  | 5.706771000000  | -2.393471000000 |
| C | 4.533547000000  | 4.457631000000  | -2.519663000000 |
| C | 3.366498000000  | 4.330957000000  | -3.270024000000 |
| C | 2.780369000000  | 5.441966000000  | -3.887522000000 |
| C | 3.399021000000  | 6.689203000000  | -3.746139000000 |
| C | 4.571910000000  | 6.825086000000  | -3.008381000000 |
| H | 6.043573000000  | 5.804221000000  | -1.808459000000 |
| H | 4.965902000000  | 3.584385000000  | -2.044977000000 |
| H | 2.950054000000  | 7.553344000000  | -4.222928000000 |
| H | 5.040043000000  | 7.798010000000  | -2.909578000000 |
| O | 2.710275000000  | 3.112919000000  | -3.375255000000 |
| C | 3.398707000000  | 1.976374000000  | -3.762526000000 |
| C | 4.461203000000  | 2.030456000000  | -4.663125000000 |
| C | 2.947631000000  | 0.747543000000  | -3.252490000000 |
| C | 5.096389000000  | 0.855023000000  | -5.054877000000 |
| H | 4.789615000000  | 2.986555000000  | -5.052406000000 |
| C | 3.597993000000  | -0.421339000000 | -3.669660000000 |
| C | 4.668341000000  | -0.375157000000 | -4.557691000000 |
| H | 5.920651000000  | 0.905376000000  | -5.758075000000 |
| H | 3.245698000000  | -1.372778000000 | -3.289006000000 |
| H | 5.155971000000  | -1.292625000000 | -4.867302000000 |
| C | 1.812062000000  | 0.653386000000  | -2.294807000000 |
| N | 0.626412000000  | 1.263607000000  | -2.601088000000 |
| H | 0.664068000000  | 2.046436000000  | -3.235360000000 |
| H | -0.032408000000 | 1.363717000000  | -1.841934000000 |
| N | 1.998658000000  | -0.092670000000 | -1.253305000000 |
| C | 1.521999000000  | 5.309754000000  | -4.677295000000 |
| N | 0.351407000000  | 5.118719000000  | -4.002015000000 |
| N | 1.621798000000  | 5.452874000000  | -5.956441000000 |
| H | 0.385393000000  | 4.838151000000  | -3.035714000000 |

|    |                 |                 |                 |
|----|-----------------|-----------------|-----------------|
| H  | -0.457698000000 | 4.824625000000  | -4.528315000000 |
| O  | 0.322574000000  | 5.335875000000  | -6.549039000000 |
| H  | 0.501394000000  | 5.390964000000  | -7.495047000000 |
| Cs | 4.992963000000  | -0.823324000000 | 0.279386000000  |
| O  | 0.797486000000  | -0.135830000000 | -0.479356000000 |
| H  | 1.040234000000  | -0.655276000000 | 0.296061000000  |

### CsB1

|    |                 |                 |                 |
|----|-----------------|-----------------|-----------------|
| C  | 4.975307000000  | 5.529986000000  | -2.580119000000 |
| C  | 4.624121000000  | 4.325880000000  | -3.188519000000 |
| C  | 3.420749000000  | 4.227598000000  | -3.890798000000 |
| C  | 2.556902000000  | 5.333625000000  | -3.979619000000 |
| C  | 2.937028000000  | 6.532091000000  | -3.367438000000 |
| C  | 4.138341000000  | 6.640478000000  | -2.671210000000 |
| H  | 5.912993000000  | 5.594859000000  | -2.038257000000 |
| H  | 5.287814000000  | 3.473089000000  | -3.127965000000 |
| H  | 2.267660000000  | 7.382078000000  | -3.436212000000 |
| H  | 4.412083000000  | 7.577647000000  | -2.199377000000 |
| O  | 3.040541000000  | 3.090683000000  | -4.568377000000 |
| C  | 3.750373000000  | 1.904542000000  | -4.365566000000 |
| C  | 4.755396000000  | 1.591260000000  | -5.274329000000 |
| C  | 3.427496000000  | 1.059008000000  | -3.290924000000 |
| C  | 5.498104000000  | 0.423397000000  | -5.114248000000 |
| H  | 4.958443000000  | 2.277311000000  | -6.089711000000 |
| C  | 4.199545000000  | -0.107335000000 | -3.148485000000 |
| C  | 5.226436000000  | -0.419505000000 | -4.036216000000 |
| H  | 6.281555000000  | 0.178783000000  | -5.823510000000 |
| H  | 3.963809000000  | -0.780884000000 | -2.332817000000 |
| H  | 5.797792000000  | -1.331782000000 | -3.899718000000 |
| C  | 2.320795000000  | 1.338503000000  | -2.353176000000 |
| N  | 1.058739000000  | 1.719701000000  | -2.862643000000 |
| H  | 0.780333000000  | 1.200995000000  | -3.688419000000 |
| H  | 0.387393000000  | 1.594752000000  | -2.104791000000 |
| N  | 2.517833000000  | 1.226667000000  | -1.072157000000 |
| C  | 1.254925000000  | 5.254842000000  | -4.699025000000 |
| N  | 0.341360000000  | 4.330865000000  | -4.290127000000 |
| N  | 1.054776000000  | 6.142853000000  | -5.621144000000 |
| H  | 0.665830000000  | 3.521088000000  | -3.758307000000 |
| H  | -0.436398000000 | 4.165620000000  | -4.912679000000 |
| O  | 1.424561000000  | 1.451023000000  | -0.300830000000 |
| O  | -0.264105000000 | 5.973432000000  | -6.164186000000 |
| H  | -0.291182000000 | 6.612576000000  | -6.885529000000 |
| Cs | 2.357062000000  | 4.138635000000  | 0.988286000000  |

## CsB2

|    |                 |                 |                 |
|----|-----------------|-----------------|-----------------|
| C  | 5.133188000000  | 5.464023000000  | -2.718726000000 |
| C  | 4.737646000000  | 4.246157000000  | -3.269658000000 |
| C  | 3.487127000000  | 4.135629000000  | -3.876033000000 |
| C  | 2.618081000000  | 5.239428000000  | -3.932238000000 |
| C  | 3.041917000000  | 6.451445000000  | -3.377824000000 |
| C  | 4.290727000000  | 6.571961000000  | -2.773146000000 |
| H  | 6.107590000000  | 5.539613000000  | -2.247992000000 |
| H  | 5.402703000000  | 3.392526000000  | -3.234218000000 |
| H  | 2.370436000000  | 7.301175000000  | -3.417505000000 |
| H  | 4.597572000000  | 7.518844000000  | -2.343451000000 |
| O  | 3.042497000000  | 2.976053000000  | -4.479906000000 |
| C  | 3.763437000000  | 1.796587000000  | -4.331793000000 |
| C  | 4.699108000000  | 1.456558000000  | -5.302730000000 |
| C  | 3.501533000000  | 0.949240000000  | -3.246400000000 |
| C  | 5.404132000000  | 0.259531000000  | -5.192107000000 |
| H  | 4.872123000000  | 2.135237000000  | -6.130316000000 |
| C  | 4.226785000000  | -0.244213000000 | -3.147327000000 |
| C  | 5.173208000000  | -0.588105000000 | -4.109522000000 |
| H  | 6.132794000000  | -0.006126000000 | -5.950085000000 |
| H  | 4.030617000000  | -0.907661000000 | -2.312893000000 |
| H  | 5.720387000000  | -1.519763000000 | -4.018524000000 |
| C  | 2.470108000000  | 1.279055000000  | -2.223919000000 |
| N  | 1.167642000000  | 1.473237000000  | -2.643303000000 |
| H  | 0.897082000000  | 0.950830000000  | -3.465643000000 |
| H  | 0.479785000000  | 1.427330000000  | -1.901946000000 |
| N  | 2.869727000000  | 1.388317000000  | -1.004436000000 |
| C  | 1.269092000000  | 5.148252000000  | -4.558541000000 |
| N  | 0.394981000000  | 4.207399000000  | -4.109287000000 |
| N  | 0.997646000000  | 6.046021000000  | -5.454534000000 |
| H  | 0.749131000000  | 3.401729000000  | -3.605315000000 |
| H  | -0.442493000000 | 4.057795000000  | -4.651819000000 |
| O  | -0.343288000000 | 5.842892000000  | -5.938470000000 |
| H  | -0.530271000000 | 6.652930000000  | -6.428009000000 |
| Cs | 1.208975000000  | 4.142180000000  | -8.507266000000 |
| O  | 1.759462000000  | 1.654123000000  | -0.152388000000 |
| H  | 2.150057000000  | 1.684330000000  | 0.729078000000  |

## CsC1

|   |                |                |                 |
|---|----------------|----------------|-----------------|
| C | 4.900700000000 | 5.370258000000 | -2.462272000000 |
| C | 4.367954000000 | 4.139163000000 | -2.838640000000 |
| C | 3.193380000000 | 4.096112000000 | -3.590555000000 |
| C | 2.545785000000 | 5.283029000000 | -3.965723000000 |



|    |                 |                 |                 |
|----|-----------------|-----------------|-----------------|
| C  | 3.095823000000  | 6.507137000000  | -3.575966000000 |
| C  | 4.269884000000  | 6.558594000000  | -2.827919000000 |
| H  | 5.813654000000  | 5.395248000000  | -1.876752000000 |
| H  | 4.861767000000  | 3.218075000000  | -2.554217000000 |
| H  | 2.596582000000  | 7.423784000000  | -3.871319000000 |
| H  | 4.687518000000  | 7.515489000000  | -2.535792000000 |
| O  | 2.591367000000  | 2.913973000000  | -3.967730000000 |
| C  | 3.374824000000  | 1.761416000000  | -4.112118000000 |
| C  | 4.321013000000  | 1.732119000000  | -5.134589000000 |
| C  | 3.157077000000  | 0.663840000000  | -3.260610000000 |
| C  | 5.108104000000  | 0.601101000000  | -5.323237000000 |
| H  | 4.439252000000  | 2.604196000000  | -5.768802000000 |
| C  | 3.965064000000  | -0.470259000000 | -3.485589000000 |
| C  | 4.929395000000  | -0.502558000000 | -4.484886000000 |
| H  | 5.843448000000  | 0.578828000000  | -6.120236000000 |
| H  | 3.809054000000  | -1.335935000000 | -2.853543000000 |
| H  | 5.528473000000  | -1.396417000000 | -4.625346000000 |
| C  | 2.153737000000  | 0.649760000000  | -2.177096000000 |
| N  | 0.902892000000  | 1.260489000000  | -2.360274000000 |
| H  | 0.933432000000  | 2.127006000000  | -2.879028000000 |
| H  | 0.454376000000  | 1.351368000000  | -1.451817000000 |
| N  | 2.415930000000  | -0.022688000000 | -1.091371000000 |
| C  | 1.291334000000  | 5.245607000000  | -4.773899000000 |
| N  | 0.104607000000  | 5.099701000000  | -4.117057000000 |
| N  | 1.416162000000  | 5.417917000000  | -6.047302000000 |
| H  | 0.115546000000  | 4.793951000000  | -3.157578000000 |
| H  | -0.708561000000 | 4.845980000000  | -4.658830000000 |
| O  | 1.437742000000  | -0.007074000000 | -0.152884000000 |
| O  | 0.112352000000  | 5.399442000000  | -6.659360000000 |
| H  | 0.310592000000  | 5.317138000000  | -7.599928000000 |
| Cs | 3.505946000000  | -1.728414000000 | 1.452110000000  |
| Cs | -1.460911000000 | 8.363958000000  | -6.424210000000 |

### CsC2

|   |                |                |                 |
|---|----------------|----------------|-----------------|
| C | 5.018035000000 | 5.570387000000 | -2.474645000000 |
| C | 4.441667000000 | 4.309475000000 | -2.602570000000 |
| C | 3.260656000000 | 4.163243000000 | -3.327323000000 |
| C | 2.635869000000 | 5.268842000000 | -3.918099000000 |
| C | 3.230471000000 | 6.527990000000 | -3.776117000000 |
| C | 4.416056000000 | 6.682662000000 | -3.063254000000 |
| H | 5.936780000000 | 5.681252000000 | -1.908997000000 |
| H | 4.905740000000 | 3.441237000000 | -2.149306000000 |
| H | 2.751205000000 | 7.386458000000 | -4.232850000000 |
| H | 4.864068000000 | 7.664866000000 | -2.963343000000 |
| O | 2.633993000000 | 2.930919000000 | -3.438750000000 |

|    |                 |                 |                 |
|----|-----------------|-----------------|-----------------|
| C  | 3.364794000000  | 1.811106000000  | -3.801084000000 |
| C  | 4.383144000000  | 1.879222000000  | -4.750289000000 |
| C  | 3.003979000000  | 0.586475000000  | -3.217603000000 |
| C  | 5.063091000000  | 0.721469000000  | -5.118572000000 |
| H  | 4.642653000000  | 2.832940000000  | -5.194174000000 |
| C  | 3.697013000000  | -0.565807000000 | -3.610989000000 |
| C  | 4.723377000000  | -0.504997000000 | -4.548760000000 |
| H  | 5.852742000000  | 0.781426000000  | -5.859678000000 |
| H  | 3.414332000000  | -1.515505000000 | -3.172004000000 |
| H  | 5.246313000000  | -1.409097000000 | -4.839485000000 |
| C  | 1.918409000000  | 0.482078000000  | -2.204304000000 |
| N  | 0.671264000000  | 0.948740000000  | -2.514902000000 |
| H  | 0.605710000000  | 1.648381000000  | -3.237342000000 |
| H  | 0.030033000000  | 1.068473000000  | -1.743746000000 |
| N  | 2.213104000000  | -0.136848000000 | -1.106661000000 |
| C  | 1.367182000000  | 5.122779000000  | -4.686751000000 |
| N  | 0.223792000000  | 4.809760000000  | -4.007791000000 |
| N  | 1.426828000000  | 5.381953000000  | -5.950879000000 |
| H  | 0.310945000000  | 4.433856000000  | -3.077234000000 |
| H  | -0.557398000000 | 4.465576000000  | -4.547594000000 |
| O  | 0.113241000000  | 5.265170000000  | -6.521614000000 |
| H  | 0.281230000000  | 5.271175000000  | -7.471667000000 |
| Cs | 5.311512000000  | -0.704707000000 | 0.281119000000  |
| Cs | -1.751173000000 | 7.991445000000  | -5.926167000000 |
| O  | 1.050409000000  | -0.210898000000 | -0.277580000000 |
| H  | 1.370352000000  | -0.622986000000 | 0.533521000000  |

### CsD1

|   |                |                 |                 |
|---|----------------|-----------------|-----------------|
| C | 4.914701000000 | 5.271139000000  | -2.383539000000 |
| C | 4.545373000000 | 4.126404000000  | -3.088323000000 |
| C | 3.377093000000 | 4.129391000000  | -3.851423000000 |
| C | 2.568037000000 | 5.277614000000  | -3.906093000000 |
| C | 2.964012000000 | 6.416295000000  | -3.199188000000 |
| C | 4.131309000000 | 6.422013000000  | -2.438679000000 |
| H | 5.824945000000 | 5.257567000000  | -1.793256000000 |
| H | 5.167527000000 | 3.241100000000  | -3.052815000000 |
| H | 2.336674000000 | 7.299454000000  | -3.243922000000 |
| H | 4.420248000000 | 7.312275000000  | -1.891398000000 |
| O | 2.976653000000 | 3.061074000000  | -4.623219000000 |
| C | 3.603761000000 | 1.825375000000  | -4.451271000000 |
| C | 4.606972000000 | 1.483119000000  | -5.352332000000 |
| C | 3.206531000000 | 0.962017000000  | -3.414360000000 |
| C | 5.270780000000 | 0.264442000000  | -5.225815000000 |
| H | 4.871357000000 | 2.185891000000  | -6.135111000000 |
| C | 3.900881000000 | -0.256808000000 | -3.307206000000 |

|    |                 |                 |                 |
|----|-----------------|-----------------|-----------------|
| C  | 4.922272000000  | -0.600607000000 | -4.188116000000 |
| H  | 6.052672000000  | -0.001895000000 | -5.928785000000 |
| H  | 3.606555000000  | -0.944854000000 | -2.523257000000 |
| H  | 5.430689000000  | -1.552775000000 | -4.077501000000 |
| C  | 2.114153000000  | 1.270798000000  | -2.469470000000 |
| N  | 0.887955000000  | 1.787415000000  | -2.955669000000 |
| H  | 0.549893000000  | 1.281718000000  | -3.768728000000 |
| H  | 0.224393000000  | 1.703711000000  | -2.183515000000 |
| N  | 2.290081000000  | 1.053312000000  | -1.199306000000 |
| C  | 1.301931000000  | 5.290539000000  | -4.691828000000 |
| N  | 0.318026000000  | 4.421480000000  | -4.342160000000 |
| N  | 1.218056000000  | 6.187148000000  | -5.625663000000 |
| H  | 0.566048000000  | 3.588156000000  | -3.802572000000 |
| H  | -0.463419000000 | 4.331235000000  | -4.974872000000 |
| O  | 1.221384000000  | 1.302231000000  | -0.409573000000 |
| O  | -0.063143000000 | 6.071867000000  | -6.275806000000 |
| H  | -0.085776000000 | 6.838153000000  | -6.861303000000 |
| Cs | 1.807300000000  | 3.845523000000  | -8.255309000000 |
| Cs | 3.205608000000  | 0.374373000000  | 1.848533000000  |

### CsD2

|   |                |                 |                 |
|---|----------------|-----------------|-----------------|
| C | 5.174243000000 | 5.260874000000  | -2.453470000000 |
| C | 4.706635000000 | 4.100519000000  | -3.068107000000 |
| C | 3.486443000000 | 4.117501000000  | -3.741728000000 |
| C | 2.711919000000 | 5.290477000000  | -3.798166000000 |
| C | 3.208115000000 | 6.441643000000  | -3.174936000000 |
| C | 4.430886000000 | 6.437239000000  | -2.509116000000 |
| H | 6.124863000000 | 5.236760000000  | -1.931493000000 |
| H | 5.294211000000 | 3.192295000000  | -3.029064000000 |
| H | 2.610243000000 | 7.344427000000  | -3.211058000000 |
| H | 4.791772000000 | 7.340409000000  | -2.030034000000 |
| O | 2.976220000000 | 3.016204000000  | -4.403848000000 |
| C | 3.611595000000 | 1.783612000000  | -4.306919000000 |
| C | 4.673224000000 | 1.484977000000  | -5.154115000000 |
| C | 3.124024000000 | 0.840087000000  | -3.394379000000 |
| C | 5.276830000000 | 0.230871000000  | -5.081488000000 |
| H | 5.021320000000 | 2.234244000000  | -5.856097000000 |
| C | 3.743965000000 | -0.412532000000 | -3.331898000000 |
| C | 4.817491000000 | -0.715727000000 | -4.166260000000 |
| H | 6.104854000000 | -0.004012000000 | -5.741161000000 |
| H | 3.370258000000 | -1.151192000000 | -2.631714000000 |
| H | 5.286112000000 | -1.691737000000 | -4.108791000000 |
| C | 1.943072000000 | 1.144239000000  | -2.536854000000 |
| N | 0.733760000000 | 1.342759000000  | -3.160774000000 |
| H | 0.617248000000 | 0.894542000000  | -4.058597000000 |

|    |                 |                |                 |
|----|-----------------|----------------|-----------------|
| H  | -0.079783000000 | 1.277122000000 | -2.563000000000 |
| N  | 2.139276000000  | 1.243550000000 | -1.266552000000 |
| C  | 1.390155000000  | 5.343698000000 | -4.482286000000 |
| N  | 0.435342000000  | 4.402302000000 | -4.183910000000 |
| N  | 1.188505000000  | 6.364278000000 | -5.251010000000 |
| H  | 0.753922000000  | 3.482066000000 | -3.900627000000 |
| H  | -0.350780000000 | 4.380594000000 | -4.819649000000 |
| O  | -0.144412000000 | 6.323206000000 | -5.765280000000 |
| H  | -0.168155000000 | 7.059393000000 | -6.387793000000 |
| Cs | -0.564461000000 | 4.753993000000 | -0.681750000000 |
| Cs | 5.066743000000  | 1.252916000000 | 0.595634000000  |
| O  | 0.899605000000  | 1.528248000000 | -0.611139000000 |
| H  | 1.103062000000  | 1.418458000000 | 0.325746000000  |

### UB1

|   |                 |                 |                 |
|---|-----------------|-----------------|-----------------|
| C | 3.909698000000  | 3.290433000000  | 1.588155000000  |
| C | 3.696969000000  | 1.917383000000  | 1.683938000000  |
| C | 2.635756000000  | 1.324482000000  | 1.007016000000  |
| C | 1.758886000000  | 2.092395000000  | 0.222316000000  |
| C | 2.000532000000  | 3.471928000000  | 0.129823000000  |
| C | 3.060355000000  | 4.069396000000  | 0.804969000000  |
| H | 4.736926000000  | 3.745457000000  | 2.121591000000  |
| H | 4.349291000000  | 1.289371000000  | 2.279939000000  |
| H | 1.328495000000  | 4.084401000000  | -0.460333000000 |
| H | 3.214726000000  | 5.139535000000  | 0.724826000000  |
| O | 2.444342000000  | -0.034519000000 | 1.197282000000  |
| C | 2.753430000000  | -0.934937000000 | 0.199737000000  |
| C | 3.549512000000  | -0.607901000000 | -0.896740000000 |
| C | 2.271025000000  | -2.243738000000 | 0.373963000000  |
| C | 3.873097000000  | -1.590225000000 | -1.831902000000 |
| H | 3.926411000000  | 0.400853000000  | -1.013728000000 |
| C | 2.616398000000  | -3.211616000000 | -0.574271000000 |
| C | 3.412163000000  | -2.895175000000 | -1.673439000000 |
| H | 4.493322000000  | -1.327858000000 | -2.682397000000 |
| H | 2.241733000000  | -4.220257000000 | -0.443935000000 |
| H | 3.663223000000  | -3.659446000000 | -2.400381000000 |
| C | 1.411279000000  | -2.608870000000 | 1.534494000000  |
| N | 0.262528000000  | -1.905822000000 | 1.747890000000  |
| H | 0.177262000000  | -0.981745000000 | 1.332709000000  |
| H | -0.181745000000 | -2.030562000000 | 2.645743000000  |
| N | 1.788666000000  | -3.639108000000 | 2.223112000000  |
| C | 0.595861000000  | 1.522667000000  | -0.508481000000 |
| N | 0.349407000000  | 1.999431000000  | -1.758241000000 |
| N | -0.179721000000 | 0.677290000000  | 0.112130000000  |
| H | 1.106585000000  | 2.401567000000  | -2.287570000000 |

|   |                 |                 |                 |
|---|-----------------|-----------------|-----------------|
| H | -0.373592000000 | 1.534536000000  | -2.287209000000 |
| O | -1.227948000000 | 0.271677000000  | -0.713128000000 |
| O | 0.828666000000  | -3.894948000000 | 3.257780000000  |
| H | 1.231238000000  | -4.610621000000 | 3.763264000000  |
| U | -3.189232000000 | -0.440082000000 | -0.260737000000 |
| O | -3.537412000000 | -0.500952000000 | -2.005285000000 |
| O | -2.804881000000 | -0.289265000000 | 1.465097000000  |

**UB2**

|   |                 |                 |                 |
|---|-----------------|-----------------|-----------------|
| C | 4.054330000000  | 3.284680000000  | 1.532233000000  |
| C | 3.766390000000  | 1.926934000000  | 1.648727000000  |
| C | 2.659147000000  | 1.390606000000  | 0.999202000000  |
| C | 1.810086000000  | 2.199127000000  | 0.227194000000  |
| C | 2.127327000000  | 3.560637000000  | 0.110981000000  |
| C | 3.234944000000  | 4.102481000000  | 0.756365000000  |
| H | 4.916552000000  | 3.697801000000  | 2.043918000000  |
| H | 4.394372000000  | 1.269168000000  | 2.238797000000  |
| H | 1.479424000000  | 4.202541000000  | -0.475046000000 |
| H | 3.449773000000  | 5.160808000000  | 0.659875000000  |
| O | 2.390065000000  | 0.044238000000  | 1.198537000000  |
| C | 2.680228000000  | -0.877972000000 | 0.215207000000  |
| C | 3.510729000000  | -0.594042000000 | -0.867799000000 |
| C | 2.136139000000  | -2.163620000000 | 0.386542000000  |
| C | 3.809841000000  | -1.595515000000 | -1.790269000000 |
| H | 3.933243000000  | 0.396491000000  | -0.983372000000 |
| C | 2.457114000000  | -3.151526000000 | -0.550650000000 |
| C | 3.288375000000  | -2.877878000000 | -1.634217000000 |
| H | 4.457941000000  | -1.365947000000 | -2.629331000000 |
| H | 2.035259000000  | -4.141507000000 | -0.422874000000 |
| H | 3.519816000000  | -3.657105000000 | -2.351662000000 |
| C | 1.241009000000  | -2.488635000000 | 1.530282000000  |
| N | 0.157477000000  | -1.694168000000 | 1.774066000000  |
| H | 0.156162000000  | -0.750658000000 | 1.396691000000  |
| H | -0.287271000000 | -1.809261000000 | 2.673578000000  |
| N | 1.515705000000  | -3.573461000000 | 2.184086000000  |
| C | 0.594172000000  | 1.686980000000  | -0.462380000000 |
| N | 0.378670000000  | 2.105131000000  | -1.744581000000 |
| N | -0.236614000000 | 0.964226000000  | 0.218252000000  |
| H | 1.174423000000  | 2.381305000000  | -2.298059000000 |
| H | -0.376603000000 | 1.668908000000  | -2.251404000000 |
| O | 0.528934000000  | -3.781654000000 | 3.196686000000  |
| H | 0.866830000000  | -4.539367000000 | 3.688484000000  |
| U | -2.633455000000 | -3.215390000000 | -0.409104000000 |
| O | -2.012018000000 | -3.521696000000 | -2.013900000000 |
| O | -3.251964000000 | -2.906036000000 | 1.195135000000  |

|   |                 |                |                 |
|---|-----------------|----------------|-----------------|
| O | -1.343534000000 | 0.600766000000 | -0.610489000000 |
| H | -1.969785000000 | 0.205460000000 | 0.007672000000  |

### UB3

|   |                 |                 |                 |
|---|-----------------|-----------------|-----------------|
| C | 3.814879000000  | 2.083005000000  | 1.846158000000  |
| C | 3.410741000000  | 1.055634000000  | 0.999066000000  |
| C | 2.235752000000  | 1.183276000000  | 0.262754000000  |
| C | 1.445107000000  | 2.347838000000  | 0.386540000000  |
| C | 1.883656000000  | 3.374302000000  | 1.241529000000  |
| C | 3.057757000000  | 3.247417000000  | 1.968193000000  |
| H | 4.735745000000  | 1.970951000000  | 2.407422000000  |
| H | 4.010199000000  | 0.159464000000  | 0.907447000000  |
| H | 1.315369000000  | 4.294297000000  | 1.306936000000  |
| H | 3.384993000000  | 4.053716000000  | 2.613117000000  |
| O | 1.780377000000  | 0.208540000000  | -0.589313000000 |
| C | 2.539275000000  | -0.948490000000 | -0.811559000000 |
| C | 3.484879000000  | -0.926651000000 | -1.829019000000 |
| C | 2.289557000000  | -2.101514000000 | -0.056484000000 |
| C | 4.218957000000  | -2.076979000000 | -2.107060000000 |
| H | 3.640631000000  | -0.011959000000 | -2.389584000000 |
| C | 3.041552000000  | -3.246890000000 | -0.354862000000 |
| C | 3.998030000000  | -3.236902000000 | -1.365339000000 |
| H | 4.955750000000  | -2.064779000000 | -2.902328000000 |
| H | 2.856730000000  | -4.150571000000 | 0.212911000000  |
| H | 4.562387000000  | -4.137361000000 | -1.580274000000 |
| C | 1.277826000000  | -2.148172000000 | 1.034215000000  |
| N | 0.009170000000  | -1.692287000000 | 0.799077000000  |
| H | -0.131457000000 | -1.061427000000 | 0.026209000000  |
| H | -0.562849000000 | -1.511169000000 | 1.611411000000  |
| N | 1.655507000000  | -2.706759000000 | 2.138738000000  |
| C | 0.188426000000  | 2.526379000000  | -0.354641000000 |
| N | -0.026391000000 | 2.024464000000  | -1.549374000000 |
| H | 0.675723000000  | 1.462016000000  | -2.004613000000 |
| H | -0.926011000000 | 2.144374000000  | -1.995372000000 |
| O | 0.565790000000  | -2.729468000000 | 3.055037000000  |
| H | 0.948867000000  | -3.102844000000 | 3.857909000000  |
| U | -1.800773000000 | -5.105633000000 | 1.342911000000  |
| O | -1.788327000000 | -5.088359000000 | -0.402698000000 |
| O | -1.829322000000 | -5.135816000000 | 3.087002000000  |
| O | -1.980401000000 | 3.361628000000  | -0.443280000000 |
| H | -2.093960000000 | 4.288464000000  | -0.709988000000 |
| N | -0.758651000000 | 3.291052000000  | 0.205697000000  |
| H | -0.824086000000 | 3.378853000000  | 1.211802000000  |

### UD1

|   |                 |                 |                 |
|---|-----------------|-----------------|-----------------|
| C | 3.867265000000  | 3.456574000000  | 1.545524000000  |
| C | 3.729686000000  | 2.079927000000  | 1.706638000000  |
| C | 2.710744000000  | 1.399394000000  | 1.049761000000  |
| C | 1.800068000000  | 2.077091000000  | 0.220990000000  |
| C | 1.968146000000  | 3.461412000000  | 0.062953000000  |
| C | 2.986058000000  | 4.148152000000  | 0.717248000000  |
| H | 4.661863000000  | 3.981875000000  | 2.063489000000  |
| H | 4.408214000000  | 1.518115000000  | 2.338108000000  |
| H | 1.269386000000  | 4.007449000000  | -0.560336000000 |
| H | 3.082279000000  | 5.219939000000  | 0.586043000000  |
| O | 2.593577000000  | 0.040014000000  | 1.311712000000  |
| C | 2.847444000000  | -0.885930000000 | 0.330808000000  |
| C | 3.651140000000  | -0.611487000000 | -0.773753000000 |
| C | 2.306828000000  | -2.173541000000 | 0.512876000000  |
| C | 3.907969000000  | -1.610551000000 | -1.709605000000 |
| H | 4.079242000000  | 0.375730000000  | -0.896773000000 |
| C | 2.578341000000  | -3.161898000000 | -0.442897000000 |
| C | 3.371917000000  | -2.887193000000 | -1.550917000000 |
| H | 4.533727000000  | -1.384053000000 | -2.565928000000 |
| H | 2.140344000000  | -4.144823000000 | -0.321525000000 |
| H | 3.563616000000  | -3.660639000000 | -2.285237000000 |
| C | 1.425539000000  | -2.492065000000 | 1.662926000000  |
| N | 0.459235000000  | -1.665720000000 | 2.016140000000  |
| H | 0.305651000000  | -0.787698000000 | 1.507948000000  |
| H | -0.113156000000 | -1.888296000000 | 2.818049000000  |
| N | 1.627621000000  | -3.656683000000 | 2.271233000000  |
| C | 0.672084000000  | 1.412155000000  | -0.483931000000 |
| N | 0.394045000000  | 1.818546000000  | -1.749166000000 |
| N | -0.050295000000 | 0.546282000000  | 0.171713000000  |
| H | 1.118230000000  | 2.252461000000  | -2.298954000000 |
| H | -0.306322000000 | 1.295645000000  | -2.253920000000 |
| O | -1.070011000000 | 0.028632000000  | -0.626313000000 |
| O | 0.736637000000  | -3.868201000000 | 3.365137000000  |
| H | 0.110903000000  | -4.551871000000 | 3.074878000000  |
| U | -3.036394000000 | -0.620377000000 | -0.058925000000 |
| O | -3.313844000000 | -1.061267000000 | -1.757500000000 |
| O | -2.661937000000 | -0.169787000000 | 1.615178000000  |
| U | 3.439732000000  | -5.109066000000 | 2.968030000000  |
| O | 3.254238000000  | -5.979889000000 | 1.453050000000  |
| O | 3.514821000000  | -4.165988000000 | 4.446203000000  |

## UD2

|   |                |                |                |
|---|----------------|----------------|----------------|
| C | 4.197249000000 | 3.390869000000 | 1.330168000000 |
| C | 3.961394000000 | 2.036402000000 | 1.552552000000 |

|   |                 |                 |                 |
|---|-----------------|-----------------|-----------------|
| C | 2.814937000000  | 1.437129000000  | 1.043417000000  |
| C | 1.872420000000  | 2.173788000000  | 0.307687000000  |
| C | 2.138865000000  | 3.533311000000  | 0.084827000000  |
| C | 3.284884000000  | 4.139821000000  | 0.590060000000  |
| H | 5.091628000000  | 3.854013000000  | 1.731686000000  |
| H | 4.659722000000  | 1.429754000000  | 2.117455000000  |
| H | 1.420987000000  | 4.125057000000  | -0.471368000000 |
| H | 3.457796000000  | 5.195054000000  | 0.411755000000  |
| O | 2.610696000000  | 0.100250000000  | 1.361773000000  |
| C | 2.654412000000  | -0.865519000000 | 0.389578000000  |
| C | 3.325247000000  | -0.695180000000 | -0.819786000000 |
| C | 2.040149000000  | -2.095229000000 | 0.691470000000  |
| C | 3.377977000000  | -1.743397000000 | -1.735573000000 |
| H | 3.812683000000  | 0.246882000000  | -1.038680000000 |
| C | 2.111487000000  | -3.138648000000 | -0.242432000000 |
| C | 2.771626000000  | -2.966761000000 | -1.453809000000 |
| H | 3.903140000000  | -1.599100000000 | -2.673398000000 |
| H | 1.625466000000  | -4.079851000000 | -0.017398000000 |
| H | 2.810514000000  | -3.778822000000 | -2.170184000000 |
| C | 1.316416000000  | -2.310655000000 | 1.966699000000  |
| N | 0.475159000000  | -1.408376000000 | 2.436377000000  |
| H | 0.317177000000  | -0.534383000000 | 1.928922000000  |
| H | 0.023322000000  | -1.559847000000 | 3.327246000000  |
| N | 1.538571000000  | -3.477132000000 | 2.556713000000  |
| C | 0.620087000000  | 1.591580000000  | -0.246653000000 |
| N | 0.247409000000  | 1.990798000000  | -1.495369000000 |
| N | -0.093545000000 | 0.811771000000  | 0.504622000000  |
| H | 0.954115000000  | 2.332205000000  | -2.127246000000 |
| H | -0.536252000000 | 1.520154000000  | -1.921353000000 |
| O | 0.847995000000  | -3.648341000000 | 3.792850000000  |
| H | 0.142591000000  | -4.294748000000 | 3.623364000000  |
| U | -1.877290000000 | -3.095120000000 | -1.645641000000 |
| O | -2.282628000000 | -1.844933000000 | -2.797349000000 |
| O | -1.477487000000 | -4.349495000000 | -0.495453000000 |
| U | 3.389965000000  | -4.898556000000 | 3.163180000000  |
| O | 2.917264000000  | -6.027603000000 | 1.899973000000  |
| O | 3.783764000000  | -3.672686000000 | 4.357734000000  |
| O | -1.247988000000 | 0.385038000000  | -0.218028000000 |
| H | -1.771694000000 | -0.095305000000 | 0.434736000000  |

### UD3

|   |                |                |                |
|---|----------------|----------------|----------------|
| C | 3.554772000000 | 2.532245000000 | 1.687431000000 |
| C | 3.348817000000 | 1.241869000000 | 1.207055000000 |
| C | 2.205210000000 | 0.955818000000 | 0.470122000000 |
| C | 1.247055000000 | 1.956137000000 | 0.222636000000 |



|   |                 |                 |                 |
|---|-----------------|-----------------|-----------------|
| C | 1.470814000000  | 3.248612000000  | 0.724336000000  |
| C | 2.620566000000  | 3.538582000000  | 1.446304000000  |
| H | 4.450226000000  | 2.746256000000  | 2.259707000000  |
| H | 4.068330000000  | 0.459177000000  | 1.412827000000  |
| H | 0.752770000000  | 4.033101000000  | 0.516758000000  |
| H | 2.787079000000  | 4.543327000000  | 1.815054000000  |
| O | 1.914389000000  | -0.322713000000 | 0.032719000000  |
| C | 2.924992000000  | -1.205870000000 | -0.322642000000 |
| C | 3.882445000000  | -0.826875000000 | -1.257870000000 |
| C | 2.910164000000  | -2.507993000000 | 0.212498000000  |
| C | 4.831257000000  | -1.746462000000 | -1.691075000000 |
| H | 3.876873000000  | 0.182699000000  | -1.651088000000 |
| C | 3.866874000000  | -3.424971000000 | -0.262256000000 |
| C | 4.817800000000  | -3.051709000000 | -1.200183000000 |
| H | 5.567678000000  | -1.444864000000 | -2.427095000000 |
| H | 3.846828000000  | -4.444200000000 | 0.101067000000  |
| H | 5.540123000000  | -3.778033000000 | -1.552992000000 |
| C | 1.977103000000  | -2.938752000000 | 1.276710000000  |
| N | 0.806307000000  | -2.360443000000 | 1.478163000000  |
| H | 0.514301000000  | -1.577724000000 | 0.914216000000  |
| H | 0.228140000000  | -2.648312000000 | 2.254811000000  |
| N | 2.386567000000  | -3.974781000000 | 2.008447000000  |
| C | 0.012063000000  | 1.691789000000  | -0.539447000000 |
| N | -0.013440000000 | 1.015385000000  | -1.664747000000 |
| H | 0.833124000000  | 0.677890000000  | -2.093734000000 |
| H | -0.892227000000 | 0.835081000000  | -2.132148000000 |
| O | 1.521883000000  | -4.250240000000 | 3.117387000000  |
| H | 1.104623000000  | -5.112284000000 | 2.948131000000  |
| U | -4.630688000000 | -0.914542000000 | 0.489841000000  |
| O | -5.494051000000 | -1.509636000000 | -0.904743000000 |
| O | -3.765650000000 | -0.321173000000 | 1.884507000000  |
| U | 4.098491000000  | -4.445248000000 | 3.643278000000  |
| O | 4.033893000000  | -6.111491000000 | 3.080617000000  |
| O | 3.957497000000  | -2.764035000000 | 4.138643000000  |
| O | -2.295813000000 | 1.926865000000  | -0.724370000000 |
| H | -2.622870000000 | 2.761493000000  | -1.099517000000 |
| N | -1.115161000000 | 2.225687000000  | -0.070034000000 |
| H | -1.218874000000 | 2.469175000000  | 0.907229000000  |

**Table S3:** Strontium Complex bond distances, bond indices, natural population analysis, and selected metrics

| Species | Moiety               | Bond               | Distance (Å) | $\rho$ | $\nabla^2\rho$ | H          | WBI        | LBO        | NPA     |
|---------|----------------------|--------------------|--------------|--------|----------------|------------|------------|------------|---------|
| Sr (A)  | bis-AO <sup>-1</sup> | Sr-O(neg)          | 2.506        | 0.0322 | 0.1713         | 0.0045     | 0.32865152 | 0.05751686 | 1.99175 |
|         |                      | Sr-N               | 3.346        | NA     |                |            | 0.06980665 | 0.00005902 |         |
|         | bis-AO               | Sr-O               | 2.793        | 0.0168 | 0.0773         | 0.0026     | 0.18898451 | 0.01375858 | 1.99557 |
|         |                      | Sr-N               | 3.669        |        |                |            | 0.03146014 | 0.00000194 |         |
|         | bis-AO <sup>+1</sup> | Sr-O (pos1)        | 2.982        | 0.0100 | 0.0469         | 0.0019     | 0.13909775 | 0.00649217 | 1.99788 |
|         |                      | Sr-N               | 3.946        |        |                |            | 0.01465325 | 0.00000023 |         |
| Sr (B)  | bis-AO <sup>-1</sup> | Sr-O               | 3.976        | NA     |                |            | 0.01320934 | 0.00000491 | 1.99130 |
|         |                      | Sr-N(amine)        | 2.753        | 0.0234 | 0.1009         | 0.0026     | 0.25683126 | 0.02636668 |         |
|         |                      | Sr-COC             | 3.281        | NA     |                |            | 0.05199987 | 0.00083532 |         |
|         | bis-AO               | Sr-O               | 4.082        |        |                |            | 0.00788816 | 0.00000113 | 1.99360 |
|         |                      | Sr-N (amine)       | 2.913        | 0.0167 | 0.0684         | 0.0021     | 0.18944448 | 0.01130221 |         |
|         |                      | Sr-COC             | 3.323        |        |                |            | 0.05058409 | 0.00060454 |         |
|         | bis-AO <sup>+1</sup> | Sr-O (pos1)        | 5.650        |        |                |            | 0.00066480 | 0.00000000 | 1.99538 |
|         |                      | Sr-N (amine, pos1) | 4.878        |        |                |            | 0.00226256 | 0.00000001 |         |
| Sr-COC  |                      | 4.105              | 0.0007       | 0.0037 | 0.0002         | 0.00638374 | 0.00000377 |            |         |

**Table S4:** Strontium Complex bond distances, bond indices, natural population analysis, and selected metrics

| Species         | Moiety               | Bond                  | Distance (Å)     | $\rho$ | $\nabla^2\rho$ | H       | WBI        | LBO        | NPA        |         |
|-----------------|----------------------|-----------------------|------------------|--------|----------------|---------|------------|------------|------------|---------|
| Sr (C)          | bis-AO <sup>-1</sup> | Sr1-O<br>(neutral AO) | 2.782            | 0.0171 | 0.0796         | 0.0027  | 0.19601602 | 0.01411671 | 1.99620    |         |
|                 |                      | Sr1-N                 | 3.713            |        |                |         | 0.02904177 | 0.00000107 |            |         |
|                 |                      | Sr2-O<br>(neg1)       | 2.504            | 0.0319 | 0.1717         | 0.0046  | 0.33013523 | 0.05701231 | 1.99239    |         |
|                 |                      | Sr2-N                 | 3.404            |        |                |         | 0.06051120 | 0.00002402 |            |         |
|                 | bis-AO               | Sr1-O                 | 2.805            | 0.0164 | 0.0751         | 0.0025  | 0.18776967 | 0.01257322 | 1.99590    |         |
|                 |                      | Sr1-N                 | 3.695            |        |                |         | 0.03064843 | 0.00000144 |            |         |
|                 |                      | Sr2-O                 | 2.781            | 0.0173 | 0.0799         | 0.0027  | 0.19215682 | 0.01418740 | 1.99629    |         |
|                 |                      | Sr2-N                 | 3.631            |        |                |         | 0.03437380 | 0.00000327 |            |         |
|                 | bis-AO <sup>+1</sup> | Sr1-O                 | 2.950            | 0.0120 | 0.0524         | 0.0018  | 0.14568394 | 0.00602898 | 1.99672    |         |
|                 |                      | Sr1-N                 | 3.806            |        |                |         | 0.02432740 | 0.00000065 |            |         |
|                 |                      | Sr2-O<br>(pos1)       | 2.983            | 0.0100 | 0.0467         | 0.0019  | 0.13833443 | 0.00649902 | 1.99848    |         |
|                 |                      | Sr2-N<br>(pos1)       | 3.938            |        |                |         | 0.01494250 | 0.00000024 |            |         |
|                 | Sr (D)               | bis-AO <sup>-1</sup>  | Sr1-N<br>(amine) | 2.816  |                |         |            | 0.10272001 | 0.00094531 | 1.99418 |
|                 |                      |                       | Sr1-COC          | 3.412  |                |         |            | 0.02114502 | 0.00007146 |         |
| Sr2-O<br>(neg1) |                      |                       | 2.583            | 0.0106 | 0.0423         | 0.0012  | 0.14216036 | 0.00830183 | 1.99310    |         |
| Sr2-N           |                      |                       | 2.684            | 0.0060 | 0.0234         | 0.0009  | 0.03623261 | 0.00001239 |            |         |
| bis-AO          |                      | Sr1-N<br>(amine)      | 2.996            | 0.0139 | 0.0557         | 0.0018  | 0.17225615 | 0.00607635 | 1.99397    |         |
|                 |                      | Sr1-COC               | 3.600            | 0.3011 | -0.7083        | -0.2935 | 0.02478947 | 0.00008883 |            |         |
|                 |                      | Sr2-O                 | 2.830            | 0.0157 | 0.0706         | 0.0023  | 0.17846674 | 0.00988804 | 1.99635    |         |
|                 |                      | Sr2-N                 | 3.619            |        |                |         | 0.03647295 | 0.00000665 |            |         |

**Table S5:** Cesium Complex bond distances, bond indices, natural population analysis, and selected metrics

| Species | Moiety               | Bond         | Distance (Å) | $\rho$ | $\nabla^2\rho$ | H          | WBI        | LBO        | NPA     |
|---------|----------------------|--------------|--------------|--------|----------------|------------|------------|------------|---------|
| Cs (A)  | bis-AO <sup>-1</sup> | Cs-O(neg1)   | 3.141        | 0.0137 | 0.0477         | 0.0008     | 0.16514419 | 0.00587800 | 0.99323 |
|         |                      | Cs-N         | 3.241        | 0.0108 | 0.0443         | 0.0015     | 0.20490154 | 0.00388807 |         |
|         | bis-AO               | Cs-O         | 4.319        |        |                |            | 0.00803927 | 0.00000022 | 0.99691 |
|         |                      | Cs-N         | 3.442        | 0.0082 | 0.0279         | 0.0011     | 0.16318213 | 0.00442364 |         |
| Cs (B)  | bis-AO <sup>-1</sup> | Cs-N (neg)   | 4.101        |        |                |            | 0.03517797 | 0.00000050 | 0.99703 |
|         |                      | Cs-O (neg)   | 3.069        | 0.0152 | 0.0554         | 0.0012     | 0.23479744 | 0.01110819 |         |
|         | bis-AO               | Cs-O         | 3.450        | 0.0073 | 0.0258         | 0.0008     | 0.08783593 | 0.00063882 | 0.99668 |
|         |                      | Cs-N         | 3.604        |        |                |            | 0.10291157 | 0.00024087 |         |
|         |                      | Cs-COC       | 4.576        |        |                |            | 0.00553921 | 0.00000067 |         |
| Cs (C)  | bis-AO <sup>-1</sup> | Cs1-O (neg1) | 3.133        | 0.0140 | 0.0485         | 0.0008     | 0.16856339 | 0.00619772 | 0.99322 |
|         |                      | Cs1-N (neg1) | 3.251        |        |                |            | 0.20199844 | 0.00361153 |         |
|         |                      | Cs2-O        | 3.364        | 0.0088 | 0.0301         | 0.0009     | 0.12721263 | 0.00175665 | 0.99776 |
|         | bis-AO               | Cs2-N        | 4.135        |        |                |            | 0.03239509 | 0.00000120 |         |
|         |                      | Cs1-O        | 3.356        | 0.0089 | 0.0306         | 0.0009     | 0.12734578 | 0.00182081 | 0.99774 |
|         |                      | Cs1-N        | 4.112        |        |                |            | 0.03290230 | 0.00000131 |         |
|         |                      | Cs2-O        | 4.326        |        |                |            | 0.00795912 | 0.00000021 | 0.99680 |
| Cs2-N   | 3.442                | 0.0083       | 0.0280       | 0.0011 | 0.16446641     | 0.00459225 |            |            |         |
| Cs (D)  | bis-AO <sup>-1</sup> | Cs1-O        | 3.518        | 0.0063 | 0.0233         | 0.0008     | 0.07141039 | 0.00034135 | 0.99567 |
|         |                      | Cs1-N        | 3.570        | 0.0056 | 0.0214         | 0.0009     | 0.10151949 | 0.00025808 |         |
|         |                      | Cs1-COC      | 3.895        | 0.0026 | 0.0106         | 0.0005     | 0.02890720 | 0.00005417 |         |
|         |                      | Cs2-O (neg1) | 3.146        | 0.0136 | 0.0475         | 0.0008     | 0.16461656 | 0.00574462 | 0.99335 |
|         | bis-AO               | Cs2-N (neg1) | 3.254        |        |                |            | 0.20345897 | 0.00364111 |         |
|         |                      | Cs1-COC      | 4.115        |        |                |            | 0.01794670 | 0.00003049 | 0.99677 |
|         |                      | Cs2-N        | 3.479        | 0.0076 | 0.0268         | 0.0011     | 0.15765724 | 0.00390318 | 0.99714 |
|         |                      | Cs2-O        | 4.328        | 0.0015 | 0.0068         | 0.0004     | 0.00822881 | 0.00000021 |         |

**Table S6:** Uranium Complex bond distances, bond indices, natural population analysis, and selected metrics

| Species | Moiety               | Bond                 | Distance (Å) | $\rho$ | $\nabla^2\rho$ | H      | WBI        | LBO        | NPA     |            |
|---------|----------------------|----------------------|--------------|--------|----------------|--------|------------|------------|---------|------------|
| U (B)   | bis-AO <sup>-1</sup> | U-O(neg1)            | 2.135        | 0.0715 | 0.6498         | 0.0008 | 0.64001891 | 0.73558179 | 2.67806 |            |
|         |                      | U-N                  | 3.232        |        |                |        | 0.07145278 | 0.00010100 |         |            |
|         | bis-AO               | U-O                  | 4.033        | 0.0007 | 0.0057         | 0.0004 | 0.01065062 | 0.00000662 | 3.20123 |            |
|         |                      | U-N(amine)           | 3.856        |        |                |        | 0.02909088 | 0.00056431 |         |            |
|         | bis-AO <sup>+1</sup> | U-O                  | 3.765        | 0.0027 | 0.0129         | 0.0004 | 0.02101695 | 0.00088926 | 3.20880 |            |
|         |                      | U-N (amine)          | 3.902        | 0.0014 | 0.0093         | 0.0006 | 0.02262312 | 0.00020839 |         |            |
| U (D)   | bis-AO <sup>-1</sup> | U1-O                 | 3.001        |        |                |        | 0.11131410 | 0.00535803 | 2.84862 |            |
|         |                      | U1-N                 | 2.425        | 0.0414 | 0.3240         | 0.0028 | 0.41045325 | 0.67007929 |         |            |
|         |                      | U2-O (neg)           | 2.147        | 0.0700 | 0.6282         | 0.0012 | 0.62423302 | 0.72479006 |         | 2.69393    |
|         |                      | U2-N                 | 3.214        |        |                |        | 0.07233575 | 0.00014380 |         |            |
|         | bis-AO               | U1-O                 | 2.902        |        |                |        | 0.01891316 | 0.00021571 | 2.82422 |            |
|         |                      | U1-N                 | 2.412        | 0.0422 | 0.3305         | 0.0024 | 0.00173916 | 0.00000001 |         |            |
|         |                      | U1-COC               | 5.370        |        |                |        | 0.00122908 | 0.00000000 |         |            |
|         |                      | U2-O                 | 3.814        | 0.0011 | 0.0094         | 0.0006 | 0.13580676 | 0.01221387 |         | 3.23066    |
|         |                      | U2-N                 | 4.803        |        |                |        | 0.41055592 | 0.63604155 |         |            |
|         |                      | bis-AO <sup>+1</sup> | U1-O         | 2.637  |                |        |            | 0.22489598 |         | 0.07081355 |
|         | U1-N                 |                      | 2.413        | 0.0406 | 0.3137         | 0.0018 | 0.38561948 | 0.51704990 |         |            |
|         | U2-O(pos)            |                      | 3.873        | 0.0009 | 0.0078         | 0.0005 | 0.01567582 | 0.00114698 | 3.24122 |            |
|         | U2-N                 |                      | 4.747        |        |                |        | 0.00273638 | 0.00000004 |         |            |

## Calculations for Uptake Studies:

Consider the uptake of a metal ion,  $M^{n+}$  by a solid sorbent. The process can be described by a chemical equilibrium of the type:

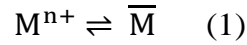

where the bar denotes the solid phase species and  $M^{n+}$  is the equilibrium concentration of the metal ion in the aqueous phase. The weight distribution ratio of the metal ion,  $D_w$ , (proportional to the equilibrium constant of reaction 1) can be written as:

$$D_w = \frac{[\bar{M}]}{[M^{n+}]} \quad (2)$$

In the presence of complexing agents in the aqueous phase, we can determine the total concentration of  $M^{n+}$ , given by the sum of all chemical species containing M. The experimentally determined  $D_{w,exp}$  is given by:

$$D_{w,exp} = \frac{[\bar{M}]}{[M^{n+}]_{tot}} \quad (3)$$

In eq. 3, the total equilibrium metal concentration in the aqueous phase can be written as:

$$[M^{n+}]_{tot} = [M^{n+}](1 + \beta_1[L^-]^1 + \dots + \beta_p[L^-]^p) \quad (4)$$

where  $L^-$  represents the aqueous complexing agent (e.g. the anion of a weak acid) and  $\beta_1$  through  $\beta_p$  are the total formation constants for the aqueous phase metal complexes from  $ML$  to  $ML_p$  (charges omitted for simplicity). By substituting equation 4 into equation 3, we obtain:

$$D_w = D_{w,exp}(1 + \beta_1[L^-]^1 + \dots + \beta_p[L^-]^p) \quad (5)$$

From equation 5, the actual value of  $D_w$  for  $M^{n+}$  can be calculated if the  $\beta$  values are known and the concentration of  $L^-$  can be estimated.  $L^-$  in all instances is the anion of the ionic medium used in the experiments (e.g.  $NO_3^-$ ) or another anion introduced in solution for a particular reason (e.g. using a buffer). In the former case, because of the very low complexing power of nitrate ions, the formation of nitrate-complexes can be neglected, unless the  $NO_3^-$  concentration is very high. In the case of a buffer (for example, an acetate/acetic acid buffer), the concentration of the anion,  $[L^-]$ , at each pH value can be calculated knowing the  $pK_a$  of the acid and the buffer concentration.

For an  $HL/L^-$  buffer the following relation holds:

$$K_a = \frac{[H^+][L^-]}{[HL]} \quad (6)$$

where  $K_a$  is the acid dissociation constant,  $[H^+]$  is the concentration of protons in solution,  $[L^-]$  is the concentration of conjugate base, and  $[HL]$  is the initial concentration of acid.

Rearranging gives (7),

$$[H^+] = K_a \frac{[HL]}{[L^-]} \quad (7)$$

The total concentration,  $C$ , of the buffer is known.

Therefore,

$$\frac{[H^+]}{K_a} = \frac{[HL]}{[L^-]} = \frac{C - [L^-]}{[L^-]} \quad (8)$$

Equation (8) can be rearranged as

$$\frac{[H^+]}{K_a} [L^-] + [L^-] = C \quad (9)$$

$$\left(\frac{[\text{H}^+]}{K_a} + 1\right) [\text{L}^-] = C \quad (10)$$

and finally

$$[\text{L}^-] = \frac{C}{\frac{[\text{H}^+]}{K_a} + 1} \quad (11)$$



**Table S7:** Percent Sr, Cs, and U sorbed as a function of pH

| <b>% Sorbed</b> | <b>Sr<sup>2+</sup></b> | <b>Cs<sup>+</sup></b> | <b>UO<sub>2</sub><sup>2+</sup></b> |
|-----------------|------------------------|-----------------------|------------------------------------|
| pH = 10         | 0                      | 23                    | 45                                 |
| pH = 9          | 0                      | 27                    | 43                                 |
| pH = 8          | 0                      | 27                    | 30                                 |
| pH = 6          | 0                      | 11                    | 99                                 |
| pH = 5          | 1.0                    | 10.                   | 99                                 |
| pH = 4          | 0                      | 11                    | 72                                 |
| pH = 3          | 1.2                    | 18                    | 38                                 |
| pH = 2          | 2.0                    | 10                    | 35                                 |

Figure S8: Uptake of  $\text{Cs}^+$  and  $\text{UO}_2^{2+}$  at pH = 8 as a function of time

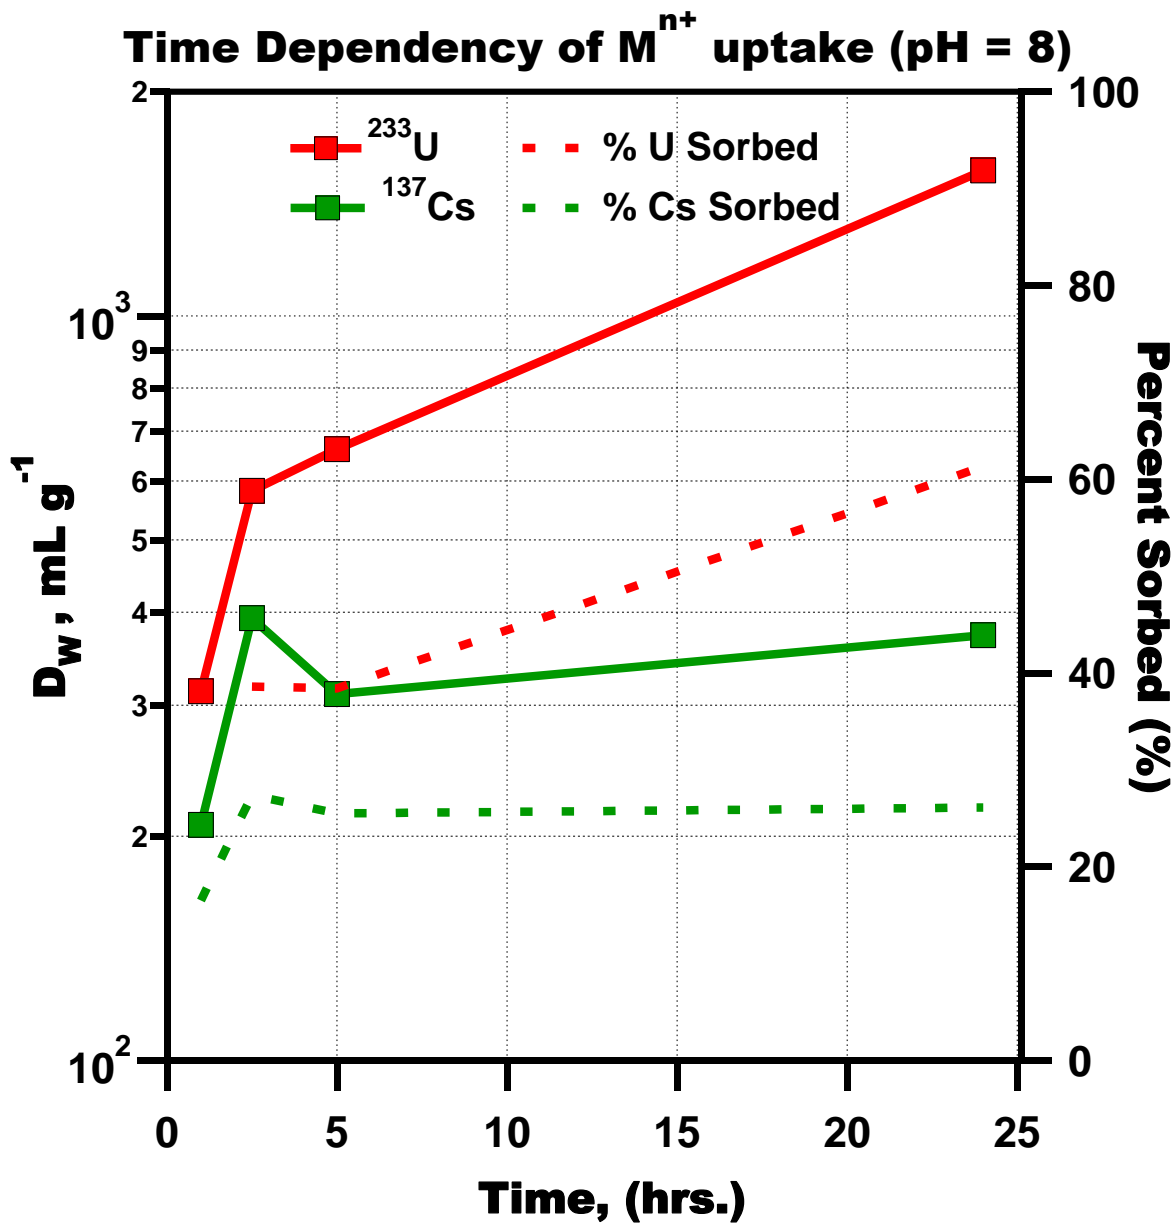

**Table S9:** Comparison of Advanced Sorbent Materials for U uptake

| Adsorbent                                                           | Type      | U uptake                                                                | M <sup>+</sup> Uptake                                                                | M <sup>2+</sup> Uptake                     | Conditions                       | Uptake Time      |
|---------------------------------------------------------------------|-----------|-------------------------------------------------------------------------|--------------------------------------------------------------------------------------|--------------------------------------------|----------------------------------|------------------|
| Bis-amidoxime functionalized polymer (this work)                    | Polymer   | $D_W^{UO_2^{2+}} = 1.38 \cdot 10^5 mL g^{-1}$                           | $D_W^{Cs^+} = 1.8 \cdot 10^1 mL g^{-1}$                                              | $D_W^{Sr^{2+}} = 0$                        | pH = 6, aqueous solution         | 30 min           |
| Amidoxime Functionalized Porous Aromatic Framework <sup>1</sup>     | Polymer   | $K_D^{UO_2^{2+}} = 1.05 \cdot 10^6 mL g^{-1}$                           | U uptake affected by presence of NaCl, and NaHCO <sub>3</sub>                        |                                            | pH = 6, aqueous solution         | 30 min           |
| Polysulfide/Layered Double Hydroxide <sup>2</sup>                   | Inorganic | $K_D^{UO_2^{2+}} = 8.4 \cdot 10^5 mL g^{-1} - 3.4 \cdot 10^6 mL g^{-1}$ | U uptake not affected by presence of CaCl <sub>2</sub> , NaCl, and NaNO <sub>3</sub> |                                            | pH = 6, aqueous solution         | 24 hrs. – 3 days |
| Layered metal sulfide <sup>3</sup>                                  | Inorganic | $K_D^{UO_2^{2+}} = 2.7 \cdot 10^4 mL g^{-1}$                            | $K_D^{Cs^+} = 5.5 \cdot 10^4 mL g^{-1}$                                              | $K_D^{Sr^{2+}} = 2.7 \cdot 10^4 mL g^{-1}$ | pH = 7, aqueous solution         | 15 hrs.          |
| Fe <sub>3</sub> O <sub>4</sub> @MOF composite material <sup>4</sup> | Inorganic | $K_D^{UO_2^{2+}} \sim 2.1 \cdot 10^3 mL g^{-1}$                         | Not investigated                                                                     |                                            | pH = 5.5, aqueous solution       | 24 hrs.          |
| Amidoxime functionalized hydrogel particles <sup>5</sup>            | Polymer   | $K_D^{UO_2^{2+}} \sim 6 \cdot 10^4 mL g^{-1}$                           | U uptake affected by Na <sup>+</sup> and Mg <sup>+</sup> ,                           |                                            | Artificial groundwater, pH = 5.9 | 5 min            |

## References

- (1) Li, B.; Sun, Q.; Zhang, Y.; Abney, C. W.; Aguila, B.; Lin, W.; Ma, S. Functionalized Porous Aromatic Framework for Efficient Uranium Adsorption from Aqueous Solutions. *ACS Appl. Mater. Interfaces* **2017**, *9* (14), 12511–12517.
- (2) Ma, S.; Huang, L.; Ma, L.; Shim, Y.; Islam, S. M.; Wang, P.; Zhao, L. D.; Wang, S.; Sun, G.; Yang, X.; Kanatzidis, M. G. Efficient Uranium Capture by Polysulfide/Layered Double Hydroxide Composites. *J. Am. Chem. Soc.* **2015**, *137* (10), 3670–3677.
- (3) Sarma, D.; Malliakas, C. D.; Subrahmanyam, K. S.; Islam, S. M.; Kanatzidis, M. G. K<sub>2</sub>X Sn<sub>4-2x</sub> S<sub>8-x</sub> (X = 0.65–1): A New Metal Sulfide for Rapid and Selective Removal of Cs<sup>+</sup>, Sr<sup>2+</sup> and UO<sub>2</sub><sup>2+</sup> Ions. *Chem. Sci.* **2016**, *7* (2), 1121–1132.
- (4) Alqadami, A. A.; Naushad, M.; Alothman, Z. A.; Ghfar, A. A. Novel Metal–Organic Framework (MOF) Based Composite Material for the Sequestration of U(VI) and Th(IV) Metal Ions from Aqueous Environment. *ACS Appl. Mater. Interfaces* **2017**, *9* (41), 36026–36037.
- (5) Sahiner, N.; Yu, H.; Tan, G.; He, J.; John, V. T.; Blake, D. A. Highly Porous Acrylonitrile-Based Submicron Particles for UO<sub>2</sub><sup>2+</sup> Absorption in an Immunosensor Assay. *ACS Appl. Mater. Interfaces* **2012**, *4* (1), 163–170.

## Full Reference for Citation 20

- 20) M. J. Frisch, G. W. Trucks, H. B. Schlegel, G. E. Scuseria, M. a. Robb, J. R. Cheeseman, J. a. Montgomery, T. Vreven, K. N. Kudin, J. C. Burant, J. M. Millam, S. S. Iyengar, J. Tomasi, V. Barone, B. Mennucci, M. Cossi, G. Scalmani, N. Rega, G. a. Petersson, H. Nakatsuji, M. Hada, M. Ehara, K. Toyota, R. Fukuda, J. Hasegawa, H. Ishida, T. Nakajima, Y. Honda, O. Kitao, H. Nakai, M. Klene, X. Li, J. E. Knox, H. P. Hratchian, J. B. Cross, C. Adamo, J. Jaramillo, R. Gomperts, R. E. Stratmann, O. Yazyev, A. J. Austin, R. Cammi, C. Pomelli, J. Ochterski, P. Y. Ayala, K. Morokuma, G. a. Voth, P. Salvador, J. J. Dannenberg, V. G. Zakrzewski, S. Dapprich, A. D. Daniels, M. C. Strain, O. Farkas, D. K. Malick, A. D. Rabuck, K. Raghavachari, J. B. Foresman, J. V. Ortiz, Q. Cui, A. G. Baboul, S. Clifford, J. Cioslowski, B. B. Stefanov, G. Liu, A. Liashenko, P. Piskorz, I. Komaromi, R. L. Martin, D. J. Fox, T. Keith, M. a. Al-Laham, C. Y. Peng, A. Nanayakkara, M. Challacombe, P. M. W. Gill, B. Johnson, W. Chen, M. W. Wong, C. Gonzalez and J. a. Pople, *an Introd. To Comput. Chem. Using G09W Avogadro Softw.*, 2009, 34.
